# Supplementary material for: Dissimilar-at-boron N-BODIPYs: from light-harvesting multichromophoric arrays to CPL-bright chiral-at-boron BODIPYs
Source: Royal Society of Chemistry journal article supplement (doi:10.1039/d3qo01561k), 2023-01-01
Supplement: d3qo01561k1.pdf [file d3qo01561k1.pdf]

## Electronic Supporting Information for:

### **Dissimilar-at-boron *N*-BODIPYs: From light-harvesting multichromophoric arrays to CPL-bright *chiral-at-boron* BODIPYs**

César Ray,<sup>a</sup> Edurne Avellanal-Zaballa,<sup>b</sup> Mónica Muñoz-Úbeda,<sup>c,d</sup> Jessica Colligan,<sup>e</sup> Florencio Moreno,<sup>a</sup> Gilles Muller,<sup>e</sup> Iván López-Montero,<sup>c,d,f</sup> Jorge Bañuelos,<sup>b</sup> Beatriz L. Maroto,<sup>\*,a</sup> and Santiago de la Moya<sup>\*,a</sup>

<sup>a</sup> Depto. de Química Orgánica, Facultad de CC. Químicas, Universidad Complutense de Madrid, Ciudad Universitaria s/n, 28040, Madrid, Spain. E-mail: santmoya@ucm.es, belora@ucm.es

<sup>b</sup> Depto. de Química Física, Universidad del País Vasco-EHU, Apartado 644, 48080, Bilbao, Spain.

<sup>c</sup> Instituto de Investigación Biomédica Hospital Doce de Octubre (imas12), Avda. de Córdoba s/n, 28041, Madrid, Spain.

<sup>d</sup> Departamento de Química Física, Facultad de Ciencias Químicas, Universidad Complutense de Madrid, Ciudad Universitaria s/n, 28040, Madrid, Spain.

<sup>e</sup> Department of Chemistry, San José State University, San José, CA 95192-0101, USA.

<sup>f</sup> Instituto Pluridisciplinar, Universidad Complutense de Madrid, Paseo de Juan XXIII 1, 28040, Madrid, Spain

|                                                            | Page |
|------------------------------------------------------------|------|
| <b>S1. General methods, instrumentation and techniques</b> | S1   |
| <b>S2. Synthetic procedures and characterization data</b>  | S5   |
| <b>S3. NMR spectra</b>                                     | S12  |
| <b>S4. Tables</b>                                          | S34  |
| <b>S5. Figures</b>                                         | S36  |
| <b>S6. References</b>                                      | S38  |

## **S1. General methods, instrumentation and techniques**

### ***S1.1 Synthesis***

Anhydrous solvents were prepared by distillation over standard drying agents according to common methods. All other solvents were of HPLC grade and were used as provided. Starting chemical substrates and reagents were used as commercially provided unless otherwise indicated. Thin-layer chromatography (TLC) was performed on silica gel plates, and the chromatograms were visualized using UV light ( $\lambda = 254$  or  $365$  nm). Flash column chromatography was performed using silica gel (230-400 mesh).  $^1\text{H}$ ,  $^{13}\text{C}$  and  $^{11}\text{B}$  spectra were recorded in  $\text{CDCl}_3$  or  $\text{DMSO-}d_6$  solution at  $20$  °C. NMR chemical shifts are expressed in parts per million ( $\delta$  scale).  $^1\text{H}$  and  $^{13}\text{C}$  NMR spectra are referenced to residual protons of  $\text{CDCl}_3$  ( $\delta = 7.26$  and  $77.16$  ppm, respectively) or  $\text{DMSO-}d_6$  ( $\delta = 2.50$  and  $39.52$  ppm, respectively) as internal standard;  $^{11}\text{B}$  spectra were referenced to 15%  $\text{BF}_3\cdot\text{Et}_2\text{O}$  in  $\text{CDCl}_3$  ( $\delta = 0.00$  ppm) as external standard. Multiplicity is indicated as follows: s = singlet; d = doublet; t = triplet; q = quartet, m = multiplet and/or multiple resonances; br = broad. Coupling constants ( $J$ ) are dated in hertz (Hz). The type of carbon (C, CH,  $\text{CH}_2$  or  $\text{CH}_3$ ) was assigned by DEPT-135 NMR experiments. Additionally, complex spin-system signals were simulated by using MestRe-C (program version 10.0.1-14719). FTIR spectra were obtained from neat samples using the attenuated total reflection (ATR) technique. High-resolution mass spectrometry (HRMS) was performed by using UPLC sample injection, electrospray ionization (ESI) and hybrid quadrupole time-of-flight mass analyser (QTOF).

### ***S1.2 X-ray diffraction***

Intensity data were collected on an Agilent Technologies Super-Nova diffractometer, which was equipped with monochromated  $\text{Cu } \alpha$  radiation ( $\lambda = 1.54184$  Å) and Atlas CCD detector. Measurement was carried out at  $150.01(10)$  K with the help of an Oxford Cryostream 700 PLUS temperature device. Data frames were processed (unit cell determination, analytical absorption correction with face indexing, intensity data integration and correction for Lorentz and polarization effects) using the CrysAlis software package.<sup>1</sup> The structure was solved using Olex22 and refined by full-matrix least-squares with SHELXL-97/14.3 Final geometrical calculations were carried out with Mercury4 and PLATON5,6 as integrated in WinGX.<sup>7</sup> Crystallographic data (excluding structure factors) for the structure reported in this paper have been deposited with the Cambridge Crystallographic Data Centre as supplementary publication number CCDC-2269820 for **NBDP-7-R** are summarized in Table S3. Copies of the data can be obtained free of charge from <https://www.ccdc.cam.ac.uk/conts/retrieving.html>.

### ***S1.3 Photophysics***

Photophysical signatures were recorded using diluted dye solutions (*ca.*  $2 \times 10^{-6}$  M) prepared from a concentrated stock solution in acetone (*ca.*  $10^{-3}$  M), after solvent evaporation under reduced pressure,

and subsequent dilution with the desired solvent of spectroscopic grade. UV-vis absorption and fluorescence spectra were recorded on a Varian (model CARY 4E) spectrophotometer and an Edinburgh Instrument spectrofluorometer (model FLSP 920), respectively. Fluorescence quantum yields ( $\phi$ ) were determined from corrected spectra (detector sensibility to the wavelength) by the optically dilute relative method and by using Eq. S1, where  $I_{exc}$  is the luminescent intensity at the excitation wavelength,  $A_{exc}$  is the absorbance at the excitation wavelength,  $\int Id\lambda$  is the numerically integrated intensity from the luminescence spectra, and  $n$  is the index of refraction of the solution. The subscripts  $R$  and  $S$  denote reference and sample, respectively. PM546 in ethanol ( $\phi^0 = 0.85$ ) was used as the reference.

$$\frac{\phi_S}{\phi_R} = \frac{I_{R exc}}{I_{S exc}} \frac{A_{R exc}}{A_{S exc}} \left( \frac{n_S}{n_R} \right)^2 \quad \text{Eq. S1}$$

The aforementioned spectrofluorometer is also equipped with a wavelength-tunable pulsed Fianium laser. Thus, the Time Correlated Single-Photon Counting (TCSPC) technique was used to record the fluorescence decay curves. Fluorescence emission was monitored at the maximum emission wavelength after excitation by the said Fianium at the maximum absorption wavelength. The fluorescence lifetime ( $\tau$ ) was obtained from the slope of the exponential fit of the decay curve, after the deconvolution of the instrumental response signal (recorded by means of a ludox scattering suspension) by means of an iterative method. The goodness of the exponential fit was controlled by statistical parameters (chi-square and the analysis of the residuals). The EET efficiency,  $Eff_{EET}$ , was calculated according to Eq. S2, where  $\phi^0$  and  $\phi$  denote the fluorescence quantum yields of the isolated anthracene donor and of covalently-linked anthracene donor in the EET molecular array, respectively.

$$Eff_{EET} = 100 \cdot [1 - (\phi / \phi^0)] \quad \text{Eq. S2}$$

#### ***S1.4. Chiroptics***

Optical rotations were recorded on a Perkin-Elmer (model 241) polarimeter ( $c$  are expressed in g / 100 mL).

Electronic Circular Dichroism (ECD) spectra were recorded on a Jasco (model J-715) spectropolarimeter using standard quartz cells of 1 cm optical-path length in chloroform solution, unless otherwise indicated, at a dye concentration of *ca.*  $5 \times 10^{-6}$  M.

Circularly polarized luminescence (CPL) and total luminescence spectra were recorded at 295 K in degassed cyclohexane (nitrogen was bubbled into the solution), at a dye concentration of *ca.*  $2 \times 10^{-3}$  M, upon excitation at *ca.* 515 nm on an instrument described previously,<sup>2</sup> operating in a differential photon-counting mode. The light source for excitation was a continuous wave 1000 W xenon arc lamp from a Spex Fluorolog-2 spectrofluorometer, equipped with excitation and emission monochromators with dispersion of 4 nm/mm (SPEX, 1681B). The excitation energy was selected by excitation-

fluorescence spectroscopy. To prevent artefacts associated with the presence of linear polarization in the emission,<sup>S1</sup> a high-quality linear polarizer was placed in the sample compartment, and aligned so that the excitation beam was linearly polarized in the direction of emission detection (z-axis). The key feature of this geometry is that it ensures that the molecules that have been excited and that are subsequently emitting are isotropically distributed in the plane (x,y) perpendicular to the direction of emission detection. The optical system detection consisted of a focusing lens, long pass filter, and 0.22 m monochromator. The emitted light was detected by a cooled EMI-9558B photomultiplier tube operating in photo-counting mode.

### ***S1.5. Electrochemistry***

Cyclic voltammograms (Metrohm Autolab) were done using a three-electrode set up with a platinum layer (surface 8 mm x 7.5 mm) as the working electrode, a platinum wire as the counter electrode, and Ag/AgCl as the reference electrode. A 0.1 M solution of tetrabutylammonium hexafluorophosphate (TBAPF<sub>6</sub>) in dry acetonitrile was used as the electrolyte solvent in which the compounds were dissolved to achieve a concentration of around 1 mM. All redox potentials were reported *vs.* ferrocene as internal standard. The solutions were purged with argon before the measurements, which were performed under the same inert atmosphere.

### ***S1.6. Quantum mechanical calculations***

Quantum mechanical calculations were performed in Gaussian 16, using the “arina” computational resources provided by the UPV-EHU. Ground state energy minimizations were performed using hybrid B3LYP functional, within the Density Functional Theory (DFT), together with the triple valence basis set with a polarization function (6-311g\*). The optimized geometries were taken as a true energy minimum using frequency calculations (no negative frequencies). The absorption transition was simulated from the ground state optimized geometry as a Franck-Condon vertical transition using the Time Dependent (TD-DFT) method at the same calculation level and basis set detailed above.

### ***S1.7. Biophotonics***

#### **S1.7.1. Fluorescence confocal microscopy**

**Cell culture:** Mouse embryonic fibroblasts (MEFs) were obtained from the American Type Culture Collection (ATCC CRL-2991). MEFs were cultured in Dulbecco modified Eagle medium high glucose (DMEM 25 mM glucose) supplemented with 10% premium fetal bovine serum (FBS, South Africa S1300; Biowest, Nuallé, France), 1% non-essential amino acids (MEM-NEA) and 1% penicillin/streptomycin (final concentration of 100 U/ml penicillin and 100 µg/ml streptomycin), from

Gibco. Cells were grown in a humidified incubator (Thermo Fisher Steri-Cycle Shape with HEPA filter, 5% CO<sub>2</sub>) at 37 °C and maintained at 80% confluence in Flask T75 (Nunc). For confocal microscopy imaging, cells were collected and seeded in an 8-chamber LabTek® slide (Thermofisher), and incubated at 37 °C to a final concentration of 10<sup>5</sup> cells/well. Prior to confocal fluorescence imaging, MEFs were supplemented with **NBDP-4** and Lysotracker<sup>TM</sup> Red (500 nM and 4 nM final concentration, respectively). Labelled MEFs were then imaged at different incubation times (0 h, 1 h, and 8 h).

**Confocal scanning laser microscopy:** Fluorescence micrographs by confocal scanning laser microscopy (CSLM) were collected using a Nikon Ti-E inverted microscope equipped with a Nikon C2 confocal scanning confocal module, 488-nm and 561-nm continuous lasers, emission band-pass filters (525/ 50 and dichroic 561LP for the green and red channel, respectively) and a Nikon Plan Apo  $\lambda$  100 $\times$  1.45 oil  $\infty$ /0.17 WD 0.13 immersion objective (Nikon ref. CFI Plan Apo DM Lambda 100X Oil). Co-localization analysis was performed on whole images and the Pearson's coefficient, R, was calculated with the JaCoP plug-in for Image J.<sup>S2</sup>

## S2. Synthetic procedures and characterization data

### S2.1. Synthesis of bis(sulfonamide)s

*N*-(2-aminoethyl)-4-methylbenzene-1-sulfonamide was obtained from ethane-1,2-diamine and tosyl chloride in an optimized 86% yield, following the described synthetic procedure.<sup>S4</sup>

*N*-(2-aminoethyl)butane-1-sulfonamide was obtained from ethane-1,2-diamine and butane-1-sulfonyl chloride in an optimized 92% yield, following the described synthetic procedure.<sup>S4</sup>

#### Synthesis of I-1:

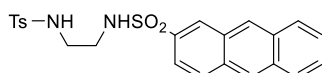

Anthracene-2-sulfonyl chloride (102 mg, 0.37 mmol) was portionwise added over a stirred solution to *N*-(2-aminoethyl)-4-methylbenzene-1-sulfonamide (79 mg, 0.37 mmol) and triethylamine (37 mg, 0.37 mmol) in CH<sub>2</sub>Cl<sub>2</sub> (10 mL) at 0 °C. The resulting mixture was stirred at room temperature for 24 h. Then, CH<sub>2</sub>Cl<sub>2</sub> (15 mL) and H<sub>2</sub>O (15 mL) were added, the two layers were separated and the aqueous layer was extracted with CH<sub>2</sub>Cl<sub>2</sub> (3 × 15 mL). The combined organic layers were washed with brine (1 × 15 mL) and dried over anhydrous Na<sub>2</sub>SO<sub>4</sub>. After filtration and solvent evaporation under reduced pressure, the residue was purified by recrystallization (petroleum ether/AcOEt) to obtain **I-1** (126 mg, 75%) as a white solid. <sup>1</sup>H NMR (DMSO-*d*<sub>6</sub>, 300 MHz) δ 8.87 (s, 1H), 8.72 (s, 1H), 8.55 (s, 1H), 8.27 (d, *J* = 9.1 Hz, 1H), 8.18 (m, 2H), 7.87 (t, *J* = 5.8 Hz, 1H), 7.71-7.60 (m, 3H), 7.59 (t, *J* = 6.0 Hz, 1H), 7.49 (d, *J* = 8.3 Hz, 2H), 7.17 (d, *J* = 8.0 Hz, 2H), 2.87-2.77 (m, 2H), 2.75-2.65 (m, 2H), 2.20 (s, 3H) ppm.

#### Synthesis of I-2:

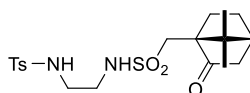

Following a similar procedure to that used for **I-1**, *N*-(2-aminoethyl)-4-methylbenzene-1-sulfonamide (500 mg, 2.33 mmol) was reacted with (1*S*)-camphor-10-sulfonyl chloride (585 mg, 2.33 mmol). The reaction crude was purified by flash chromatography (silica gel, CH<sub>2</sub>Cl<sub>2</sub>/MeOH 99:1) to obtain **I-2** (910 mg, 91%) as a white solid. [ $\alpha$ ]<sub>D</sub><sup>20</sup> +13.2 (*c* 5.00, CHCl<sub>3</sub>). <sup>1</sup>H NMR (CDCl<sub>3</sub>, 300 MHz) δ 7.74 (d, *J* = 8.3 Hz, 2H), 7.30 (d, *J* = 7.9 Hz, 2H), 5.64 (t, *J* = 6.1 Hz, 1H), 5.38 (t, *J* = 6.2 Hz, 1H), 3.42 (d, *J* = 15.1 Hz, 1H), 3.37-3.21 (m, 2H), 3.16-3.07 (m, 2H), 2.93 (d, *J* = 15.1 Hz, 1H), 2.39 (ddd, *J* = 18.6, 4.9, 3.0 Hz, 1H), 2.41 (s, 3H), 2.23 (ddd, *J* = 14.1, 10.8, 3.6 Hz, 1H), 2.12 (t, *J* = 4.4 Hz, 1H), 2.09-1.98 (m, 1H), 1.96 (d, *J* = 18.6 Hz, 1H), 1.95-1.84 (m, 1H), 1.46 (ddd, *J* = 12.4, 8.9, 3.5 Hz, 1H), 1.01 (s, 3H), 0.89 (s, 3H) ppm. <sup>13</sup>C NMR (CDCl<sub>3</sub>, 75 MHz) δ 217.6 (C), 143.7 (C), 136.7 (C), 129.9 (CH), 127.2 (CH), 59.2 (C), 49.9 (CH<sub>2</sub>), 49.1 (C), 43.5 (CH<sub>2</sub>), 43.4 (CH<sub>2</sub>), 43.1 (CH<sub>2</sub>), 42.9 (CH), 27.1 (CH<sub>2</sub>), 26.4 (CH<sub>2</sub>), 21.7 (CH<sub>3</sub>), 20.0 (CH<sub>3</sub>), 19.6 (CH<sub>3</sub>) ppm. FTIR  $\nu$  3289, 1742, 1332, 1140 cm<sup>-1</sup>.

### Synthesis of I-3:

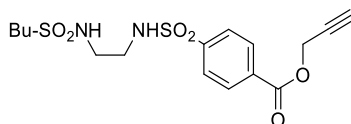

**I-3** was obtained from *N*-(2-aminoethyl)butane-1-sulfonamide in three steps in 87% overall yield, as described by us.<sup>S3</sup> Copy of NMR spectra, which were missing in preliminary ref. S3, have been included in this publication (section S3).

### Synthesis of I-4:

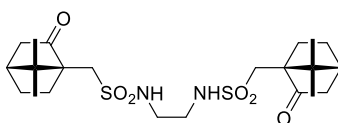

(Intermediate bis(sulfonamide) based on camphor for the synthesis of **NBDP-9**)

A solution of NaOH (82 mg, 2.05 mmol) and ethane-1,2-diamine (62 mg, 1.02 mmol) in distilled water (10 mL) was added over a solution of (1*S*)-camphor-10-sulfonyl chloride (514 mg, 2.05 mmol) in diethyl ether (10 mL) at 0 °C. The cooling bath was removed, and the reaction mixture was vigorously stirred at room temperature for 24 h. Then, CH<sub>2</sub>Cl<sub>2</sub> (15 mL) and H<sub>2</sub>O (15 mL) were added, the two layers were separated and the aqueous layer was extracted with CH<sub>2</sub>Cl<sub>2</sub> (3 × 15 mL). The combined organic layers were washed with brine (1 × 15 mL) and dried over anhydrous Na<sub>2</sub>SO<sub>4</sub>. After filtration and solvent evaporation under reduced pressure, the residue was purified by flash column chromatography (silica gel, hexane/AcOEt 7:3) to obtain **I-4** (452 mg, 90%) as a white solid.  $[\alpha]_D^{20} +29.1$  (*c* 5.00, CHCl<sub>3</sub>). <sup>1</sup>H NMR (CDCl<sub>3</sub>, 300 MHz)  $\delta$  5.65 (br s, 2H), 3.45 (d, *J* = 15.6 Hz, 2H), 3.40 (t, *J* = 2.8 Hz, 4H), 2.94 (d, *J* = 15.1 Hz, 2H), 2.39 (ddd, *J* = 18.7, 4.9, 3.0 Hz, 2H), 2.25 (ddd, *J* = 14.1, 10.7, 3.6 Hz, 2H), 2.12 (t, *J* = 4.4 Hz, 2H), 2.03 (m, 2H), 1.93 (d, *J* = 18.6 Hz, 2H), 1.94-1.85 (m, 2H), 1.45 (ddd, *J* = 12.3, 8.7, 3.7 Hz, 2H), 1.02 (s, 6H), 0.90 (s, 6H) ppm. <sup>13</sup>C NMR (CDCl<sub>3</sub>, 75 MHz)  $\delta$  216.9 (C), 59.0 (C), 49.6 (CH<sub>2</sub>), 48.9 (CH<sub>2</sub>), 43.8 (C), 42.9 (CH<sub>2</sub>), 42.8 (CH), 27.1 (CH<sub>2</sub>), 26.0 (CH<sub>2</sub>), 19.9 (CH<sub>3</sub>), 19.6 (CH<sub>3</sub>) ppm. FTIR  $\nu$  3292, 1740, 1327, 1146 cm<sup>-1</sup>.

## S2.2. Synthesis of *N*-BODIPYs

### Synthesis of NBDP-5:

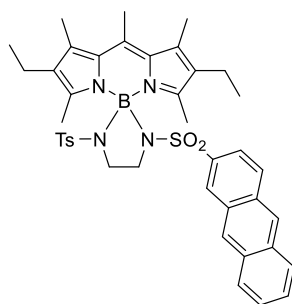

Under argon atmosphere, 1 M  $\text{BCl}_3$  solution ( $\text{CH}_2\text{Cl}_2$ , 0.32 mL, 0.32 mmol) was dropwise added over a solution of commercial 2,6-diethyl-1,3,5,7,8-pentamethyl-*F*-BODIPY (PM567, **FBDP-1**; 50 mg, 0.16 mmol) in dry  $\text{CH}_2\text{Cl}_2$  (5 mL). The reaction mixture was stirred for 5 min (disappearance of starting BODIPY was monitored by TLC). Then, triethylamine (130 mg, 1.28 mmol) was added, followed by **I-1** (214 mg, 0.48 mmol), and the mixture stirred for 30 min (the reaction progress was monitored by TLC). Then, the reaction mixture was filtered through Celite® S, and washed with  $\text{CH}_2\text{Cl}_2$  and the solvent was evaporated under reduced pressure. The reaction crude was purified by flash chromatography (silica gel, hexane/AcOEt 7:3) to obtain **NBDP-5** (40 mg, 35%) as a reddish orange solid.  $R_F = 0.20$  (hexano/EtOAc 6:4).  $^1\text{H}$  NMR ( $\text{CDCl}_3$ , 300 MHz)  $\delta$  8.39 (s, 1H), 8.33 (s, 1H), 8.07 (sa, 1H), 8.02 (m, 2H), 7.82 (d,  $J = 8.9$  Hz, 1H), 7.54 (m, 2H), 7.21 (dd,  $J = 8.8, 1.8$  Hz, 1H), 7.20 (d,  $J = 8.2$  Hz, 2H), 7.04 (d,  $J = 8.0$  Hz, 2H), 3.75-3.65 (m, 2H), 3.62-3.52 (m, 2H), 2.68 (s, 3H), 2.41 (s, 6H), 2.33 (s, 3H), 2.21 y 2.13 (ABX<sub>3</sub> system, AB part,  $J_{AB} = 14.5$  Hz,  $J_{AX} = J_{BX} = 7.5$  Hz, 4H), 1.73 (s, 6H), 0.96 (ABX<sub>3</sub> system, X part,  $J_{AX} = J_{BX} = 7.5$  Hz, 6H) ppm.  $^{13}\text{C}$  NMR ( $\text{CDCl}_3$ , 75 MHz)  $\delta$  151.6 (C), 142.1 (C), 140.1 (C), 137.3 (C), 136.7 (C), 136.4 (C), 133.2 (C), 133.1 (C), 132.8 (C), 132.2 (C), 131.6 (C), 129.8 (C), 129.1 (CH), 128.9 (CH), 128.7 (CH), 128.4 (CH), 128.3 (CH), 126.9 (CH), 126.8 (CH), 126.4 (CH), 121.9 (CH), 44.7 (CH<sub>2</sub>), 44.4 (CH<sub>2</sub>), 21.5 (CH<sub>3</sub>), 17.8 (CH<sub>3</sub>), 17.4 (CH<sub>2</sub>), 15.16 (CH<sub>3</sub>), 15.09 (CH<sub>3</sub>), 12.3 (CH<sub>3</sub>) ppm.  $^{11}\text{B}$  NMR ( $\text{CDCl}_3$ , 160 MHz)  $\delta$  -0.94 (s) ppm. FTIR  $\nu$  1526, 1479, 1326, 1192  $\text{cm}^{-1}$ . HRMS (ESI)  $m/z$ :  $[\text{M} + \text{H}]^+$  Calcd. for  $\text{C}_{41}\text{H}_{46}\text{BN}_4\text{O}_4\text{S}_2$  733.3048; Found 733.3046.

### Synthesis of NBDP-6:

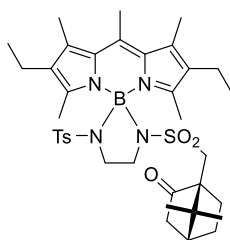

Following a similar procedure to that used for **NBDP-5**, **FBDP-1** (50 mg, 0.16 mmol) was reacted with **I-2** (206 mg, 0.48 mmol). The reaction crude was purified flash chromatography (silica gel, hexane/AcOEt 6:4) to obtain **NBDP-6** (87 mg, 78%) as an orange solid.  $R_F = 0.15$  (hexane/ AcOEt 6:4).



$[\alpha]_D^{20}$   $-56.1$  ( $c$  0.112,  $\text{CHCl}_3$ ).  $^1\text{H NMR}$  ( $\text{CDCl}_3$ , 300 MHz)  $\delta$  7.27 (d,  $J$  = 8.1 Hz, 2H), 7.10 (d,  $J$  = 8.0 Hz, 2H), 3.83-3.58 (m, 4H), 3.15 (d,  $J$  = 14.2 Hz, 1H), 2.68 (s, 3H), 2.39 (s, 3H), 2.37 (s, 3H), 2.366 (s, 3H), 2.42-2.30 (m, 5H), 2.25 (dm,  $J$  = 18.5 Hz, 1H), 2.13 (s, 3H), 2.06 (d,  $J$  = 14.2 Hz, 1H), 2.13 (s, 3H), 1.95 (t,  $J$  = 4.5 Hz, 1H), 1.92-1.76 (m, 1H), 1.82 (d,  $J$  = 18.4 Hz, 1H), 1.43 (m, 1H), 1.26 (m, 1H), 1.03 (t,  $J$  = 7.2 Hz, 3H), 1.00 (t,  $J$  = 7.2 Hz, 3H), 0.84 (s, 3H), 0.59 (s, 3H) ppm.  $^{13}\text{C NMR}$  ( $\text{CDCl}_3$ , 75 MHz)  $\delta$  215.4 (C), 152.8 (C), 149.4 (C), 142.2 (C), 140.2 (C), 137.6 (C), 137.4 (C), 136.0 (C), 133.7 (C), 133.5 (C), 133.0 (C), 132.4 (C), 129.2 (CH), 127.0 (CH), 58.1 (C), 47.6 (C), 46.1 ( $\text{CH}_2$ ), 45.4 ( $\text{CH}_2$ ), 44.2 ( $\text{CH}_2$ ), 42.7 ( $\text{CH}_2$ ), 42.5 (CH), 27.0 ( $\text{CH}_2$ ), 24.6 ( $\text{CH}_2$ ), 21.6 ( $\text{CH}_3$ ), 20.0 ( $\text{CH}_3$ ), 19.6 ( $\text{CH}_3$ ), 17.8 ( $\text{CH}_3$ ), 17.5 ( $\text{CH}_2$ ), 17.5 ( $\text{CH}_2$ ), 15.3 ( $\text{CH}_3$ ), 15.2 ( $\text{CH}_3$ ), 15.0 ( $\text{CH}_3$ ), 14.96 ( $\text{CH}_3$ ), 12.8 ( $\text{CH}_3$ ), 12.7 ( $\text{CH}_3$ ) ppm.  $^{11}\text{B NMR}$  ( $\text{CDCl}_3$ , 160 MHz)  $\delta$   $-1.04$  (s) ppm. FTIR  $\nu$  1744, 1563, 1480, 1329, 1193, 1052, 980  $\text{cm}^{-1}$ . HRMS (ESI)  $m/z$ :  $[\text{M} + \text{Na}]^+$  Calcd. for  $\text{C}_{37}\text{H}_{51}\text{BN}_4\text{O}_5\text{S}_2\text{Na}$  729.3286; Found 729.3298.

### Synthesis of NBDP-7-R and NBDP-7-S:

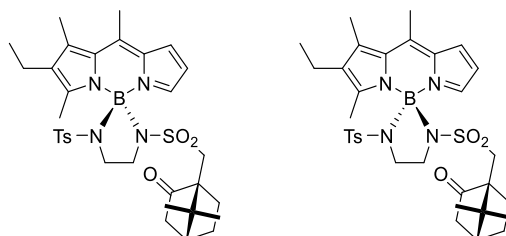

Following a similar procedure to that used for **NBDP-5**, 2-ethyl-1,3,8-trimethyl-*F*-BODIPY (**FBDP-2**)<sup>S5</sup> (50 mg, 0.19 mmol) was reacted with **I-2** (254 mg, 0.57 mmol). The reaction crude containing both diastereomers was purified by flash chromatography (silica gel, pentane/diethyl ether/AcOEt 5:4:1) to obtain, first, **NBDP-7-S** and then, **NBDP-7-R**. The absolute configuration was determined by X-Ray diffraction (see Table S3 and Figure S4).

**NBDP-7-S**: 49 mg (39%). Orange solid.  $R_F$  = 0.09 (pentane/diethyl ether/AcOEt 5:4:1).  $[\alpha]_D^{20}$   $-323$  ( $c$  0.072,  $\text{CHCl}_3$ ).  $^1\text{H NMR}$  ( $\text{CDCl}_3$ , 300 MHz)  $\delta$  7.22 (d,  $J$  = 8.2 Hz, 2H), 7.09 (d,  $J$  = 8.0 Hz, 2H), 7.03 (d,  $J$  = 3.6 Hz, 1H), 6.86 (br s, 1H), 6.24 (dd,  $J$  = 4.0, 2.2 Hz, 1H), 3.78-3.65 (m, 3H), 3.62-3.50 (m, 1H), 2.73 (d,  $J$  = 14.4 Hz, 1H), 2.65 (s, 3H), 2.44 (d,  $J$  = 14.4 Hz, 2H), 2.41 (s, 3H), 2.39 (s, 3H), 2.37 (s, 3H), 2.27-2.18 (m, 2H), 1.94 (t,  $J$  = 4.5 Hz, 1H), 1.90-1.81 (m, 1H), 1.76 (d,  $J$  = 18.3 Hz, 1H), 1.25-1.12 (m, 2H), 1.06 (t,  $J$  = 7.6 Hz, 3H), 0.93 (s, 3H), 0.69 (s, 3H) ppm.  $^{13}\text{C NMR}$  ( $\text{CDCl}_3$ , 75 MHz)  $\delta$  215.4 (C), 161.2 (C), 142.2 (C), 142.0 (C), 140.4 (C), 137.5 (C), 136.6 (CH), 135.8 (C), 134.9 (C), 129.2 (CH), 127.0 (CH), 122.0 (CH), 114.9 (CH), 58.3 (C), 47.7 (C), 47.1 ( $\text{CH}_2$ ), 45.1 ( $\text{CH}_2$ ), 44.5 ( $\text{CH}_2$ ), 42.8 (CH), 42.7 ( $\text{CH}_2$ ), 27.0 ( $\text{CH}_2$ ), 24.6 ( $\text{CH}_2$ ), 21.6 ( $\text{CH}_3$ ), 20.1 ( $\text{CH}_3$ ), 19.8 ( $\text{CH}_3$ ), 17.4 ( $\text{CH}_2$ ), 17.2 ( $\text{CH}_3$ ), 15.02 ( $\text{CH}_3$ ), 14.98 ( $\text{CH}_3$ ), 14.1 ( $\text{CH}_3$ ) ppm.  $^{11}\text{B NMR}$  ( $\text{CDCl}_3$ , 160 MHz)  $\delta$   $-1.35$  (s) ppm. FTIR  $\nu$  1743, 1575, 1328, 1174  $\text{cm}^{-1}$ . HRMS (ESI)  $m/z$ :  $[\text{M} + \text{Na}]^+$  Calcd. for  $\text{C}_{33}\text{H}_{43}\text{BN}_4\text{O}_5\text{S}_2\text{Na}$  673.2660; Found 673.2661.

**NBDP-7-R:** 46 mg (37%). Orange solid.  $R_F = 0.08$  (pentane/diethyl ether/AcOEt 5:4:1).  $[\alpha]_D^{20} +278$  ( $c$  0.102,  $\text{CHCl}_3$ ).  $^1\text{H NMR}$  ( $\text{CDCl}_3$ , 300 MHz)  $\delta$  7.26 (d,  $J = 8.1$  Hz, 2H), 7.11 (d,  $J = 8.0$  Hz, 2H), 7.01 (d,  $J = 3.5$  Hz, 1H), 6.94 (br s, 1H), 6.28 (dd,  $J = 3.9, 2.3$  Hz, 1H), 3.82-3.55 (m, 4H), 3.19 (d,  $J = 14.3$  Hz, 1H), 2.64 (s, 3H), 2.42 (q,  $J = 7.6$  Hz, 2H), 2.41 (s, 3H), 2.38 (s, 3H), 2.37 (s, 3H), 2.34 (m, 1H), 2.25 (dm,  $J = 18.0$  Hz, 1H), 1.95 (t,  $J = 4.5$  Hz, 1H), 1.92-1.88 (m, 1H), 1.83 (d,  $J = 18.4$  Hz, 1H), 1.73 (d,  $J = 14.3$  Hz, 1H), 1.57-1.44 (m, 2H), 1.33-1.23 (m, 2H), 1.08 (t,  $J = 7.6$  Hz, 3H), 0.75 (s, 3H), 0.55 (s, 3H) ppm.  $^{13}\text{C NMR}$  ( $\text{CDCl}_3$ , 75 MHz)  $\delta$  215.4 (C), 162.8 (C), 142.4 (C), 142.3 (C), 139.5 (C), 137.6 (C), 136.3 (C), 136.2 (C), 135.6 (CH), 134.7 (C), 129.3 (CH), 126.9 (CH), 121.1 (CH), 114.5 (CH), 57.9 (C), 47.9 (C), 45.9 ( $\text{CH}_2$ ), 45.0 ( $\text{CH}_2$ ), 44.4 ( $\text{CH}_2$ ), 42.7 ( $\text{CH}_2$ ), 42.3 (CH), 27.1 ( $\text{CH}_2$ ), 24.5 ( $\text{CH}_2$ ), 21.6 ( $\text{CH}_3$ ), 19.7 ( $\text{CH}_3$ ), 19.6 ( $\text{CH}_3$ ), 17.4 ( $\text{CH}_2$ ), 16.9 ( $\text{CH}_3$ ), 14.9 ( $\text{CH}_3$ ), 14.7 ( $\text{CH}_3$ ), 14.1 ( $\text{CH}_3$ ) ppm.  $^{11}\text{B NMR}$  ( $\text{CDCl}_3$ , 160 MHz)  $\delta$  -1.35 (s) ppm. FTIR  $\nu$  1744, 1578, 1399, 1176  $\text{cm}^{-1}$ . HRMS (ESI)  $m/z$ :  $[\text{M} + \text{H}]^+$  Calcd. for  $\text{C}_{33}\text{H}_{44}\text{BN}_4\text{O}_5\text{S}_2$  651.2841; Found 651.2841.

### Synthesis of NBDP-8:

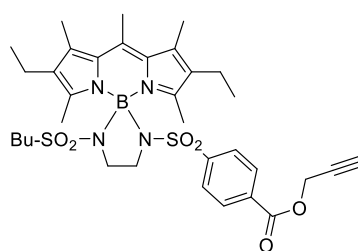

**NBDP-8** was synthesized from **FBDP-1** and **I-3**, as described by us.<sup>S3</sup> Copy of NMR spectra, as well as HRMS, which were missing in preliminary ref. S3, have been included in this publication (section S3). HRMS (ESI)  $m/z$ :  $[\text{M} + \text{H}]^+$  Calcd. for  $\text{C}_{34}\text{H}_{46}\text{BN}_4\text{O}_6\text{S}_2$  681.2946; Found 681.2953.

### Synthesis of NBDP-9:

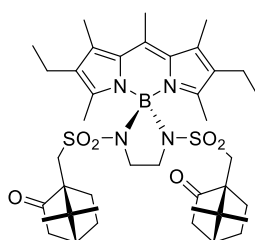

Following a similar procedure to that used for **NBDP-5**, **FBDP-1** (50 mg, 0.16 mmol) was reacted with **I-4** (230 mg, 0.48 mmol). The reaction crude was purified flash chromatography (silica gel, hexane/AcOEt 7:3) to obtain **NBDP-9** (110 mg, 92%) as an orange solid.  $R_F = 0.10$  (hexane/ AcOEt 6:4).  $[\alpha]_D^{20} +104$  ( $c$  0.11,  $\text{CHCl}_3$ ).  $[\alpha]_D^{20} 125$  ( $c$  0.01  $\text{CHCl}_3$ ).  $^1\text{H NMR}$  ( $\text{CDCl}_3$ , 300 MHz)  $\delta$  3.86 (m, 4H), 3.27 (d,  $J = 14.2$  Hz, 2H), 2.63 (s, 3H), 2.47 (s, 6H), 2.45-2.36 (m, 6H), 2.33 (s, 6H), 2.26 (md,  $J = 18.5$  Hz, 2H), 2.11 (d,  $J = 14.2$  Hz, 2H), 1.96 (t,  $J = 4.5$  Hz, 2H), 1.88 (m, 2H), 1.84 (d,  $J = 18.4$  Hz, 2H), 1.48 (ddd,  $J = 14.0, 9.4, 4.6$  Hz, 2H), 1.28 (ddd,  $J = 12.4, 9.0, 3.5$  Hz, 2H), 1.00 (t,  $J = 7.5$  Hz, 6H),

0.86 (s, 6H), 0.62 (s, 6H) ppm.  $^{13}\text{C}$  NMR ( $\text{CDCl}_3$ , 75 MHz)  $\delta$  215.4 (C), 150.5 (C), 140.5 (C), 137.0 (C), 133.5 (C), 133.2 (C), 58.1 (C), 47.6 (C), 46.3 ( $\text{CH}_2$ ), 45.1 ( $\text{CH}_2$ ), 42.7 ( $\text{CH}_2$ ), 42.5 (CH), 27.0 ( $\text{CH}_2$ ), 24.6 ( $\text{CH}_2$ ), 20.0 ( $\text{CH}_3$ ), 19.6 ( $\text{CH}_3$ ), 17.7 ( $\text{CH}_3$ ), 17.5 ( $\text{CH}_2$ ), 15.2 ( $\text{CH}_3$ ), 15.0 ( $\text{CH}_3$ ), 13.3 ( $\text{CH}_3$ ) ppm.  $^{11}\text{B}$  NMR ( $\text{CDCl}_3$ , 160 MHz)  $\delta$  -1.06 (s) ppm. FTIR  $\nu$  1744, 1563, 1480, 1324, 1193, 1048, 979  $\text{cm}^{-1}$ . HRMS (ESI)  $m/z$ :  $[\text{M} + \text{H}]^+$  Calcd. for  $\text{C}_{40}\text{H}_{60}\text{BN}_4\text{O}_6\text{S}_2$ ; 767.4042; Found 767.4053.

### S2.3. Synthesis of bioprobes by click chemistry

#### Synthesis of NBDP-2:

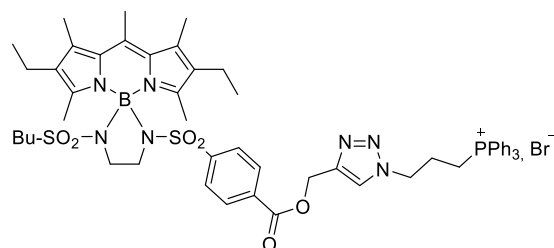

**NBDP-2** was synthesized from **NBDP-8** following the procedure described by us.<sup>S3</sup> See spectral characterization in ref. S3. Copy of NMR spectra, as well as HRMS, which were not in preliminary ref. S3, have been included in this publication (section S3). HRMS (ESI)  $m/z$ :  $[\text{M}]^+$  Calcd. for  $\text{C}_{55}\text{H}_{66}\text{BN}_7\text{O}_6\text{PS}_2$  1026.4341; Found 1026.4369.

#### Synthesis of NBDP-3:

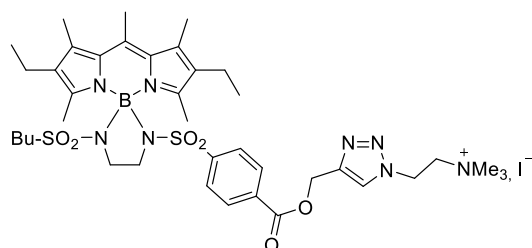

**NBDP-3** was synthesized from **NBDP-8** following the procedure described by us.<sup>S3</sup> Copy of NMR spectra, as well as HRMS, which were not in preliminary ref. S3, have been included in this publication (section S3). HRMS (ESI)  $m/z$ :  $[\text{M}]^+$  Calcd. for  $\text{C}_{40}\text{H}_{60}\text{BN}_8\text{O}_6\text{S}_2$  823.4165; Found 823.4171.

#### Synthesis of NBDP-4:

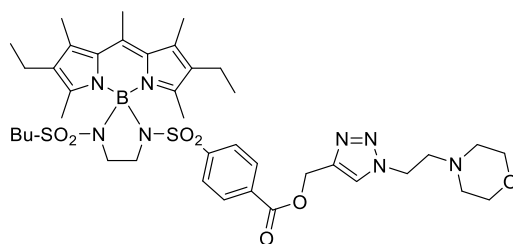

Over a mixture of **NBDP-8** (25 mg, 0.037 mmol) and 4-(2-azidoethyl)morpholine (7 mg, 0.044 mmol) in 2 mL of *t*-butanol, under argon atmosphere, a solution of  $\text{CuSO}_4 \cdot 5\text{H}_2\text{O}$  (4 mg, 0.015 mmol) in water

(1 mL) and, immediately, a solution of sodium ascorbate (6 mg, 0.030 mmol) in water (1 mL) were added dropwise. The reaction mixture was stirred at room temperature for 24 h (disappearance of **NBDP-8** was monitored by TLC). Then, CH<sub>2</sub>Cl<sub>2</sub> (15 mL) and H<sub>2</sub>O (15 mL) were added, the two layers were separated and the aqueous layer was extracted with CH<sub>2</sub>Cl<sub>2</sub> (3 × 15 mL). The combined organic layers were washed with brine (1 × 15 mL) and dried over anhydrous Na<sub>2</sub>SO<sub>4</sub>. After filtration and solvent evaporation under reduced pressure the obtained residue was purified by flash chromatography (silica gel, CH<sub>2</sub>Cl<sub>2</sub>/MeOH 95:5) to obtain **NBDP-4** (26 mg, 85%) as a red solid. *R*<sub>F</sub> = 0.34 (CH<sub>2</sub>Cl<sub>2</sub>/MeOH 95:5). <sup>1</sup>H NMR (CDCl<sub>3</sub>, 300 MHz) δ 7.94 (d, *J* = 8.3 Hz, 2H), 7.83 (s, 1H), 7.38 (d, *J* = 8.4 Hz, 2H), 5.49 (s, 2H), 4.48 (t, *J* = 6.3 Hz, 2H), 3.73-3.60 (m, 8H), 2.83 (t, *J* = 6.3 Hz, 2H), 2.69 (s, 3H), 2.53-2.42 (m, 6H), 2.46-2.23 (m, 4H), 2.38 (s, 6H), 2.04 (s, 6H), 1.54 (m, 2H), 1.22 (sext, *J* = 7.3 Hz, 2H), 0.98 (t, *J* = 7.6 Hz, 6H), 0.78 (t, *J* = 7.3 Hz, 3H) ppm. <sup>13</sup>C NMR (CDCl<sub>3</sub>, 75 MHz) δ 165.4 (C), 150.9 (C), 144.2 (C), 142.4 (C), 140.4 (C), 137.1 (C), 133.3 (C), 133.1 (C), 132.5 (C), 130.0 (CH), 127.0 (CH), 124.9 (CH), 67.0 (CH<sub>2</sub>), 58.6 (CH<sub>2</sub>), 57.9 (CH<sub>2</sub>), 53.6 (CH<sub>2</sub>), 51.1 (CH<sub>2</sub>), 47.6 (CH<sub>2</sub>), 45.1 (CH<sub>2</sub>), 44.5 (CH<sub>2</sub>), 24.6 (CH<sub>2</sub>), 21.9 (CH<sub>2</sub>), 17.9 (CH<sub>3</sub>), 17.3 (CH<sub>2</sub>), 15.1 (2 × CH<sub>3</sub>), 13.6 (CH<sub>3</sub>), 12.7 (CH<sub>3</sub>) ppm. <sup>11</sup>B NMR (CDCl<sub>3</sub>, 160 MHz) δ -1.08 (s) ppm. FTIR ν 1723, 1562, 1480, 1327, 1193 cm<sup>-1</sup>. HRMS (ESI) *m/z*: [M + H]<sup>+</sup> Calcd. for C<sub>40</sub>H<sub>58</sub>BN<sub>8</sub>O<sub>7</sub>S<sub>2</sub> 837.3957; Found 837.3961.

### S3. NMR spectra

#### <sup>1</sup>H NMR of I-1 (300 MHz, DMSO-d<sub>6</sub>)

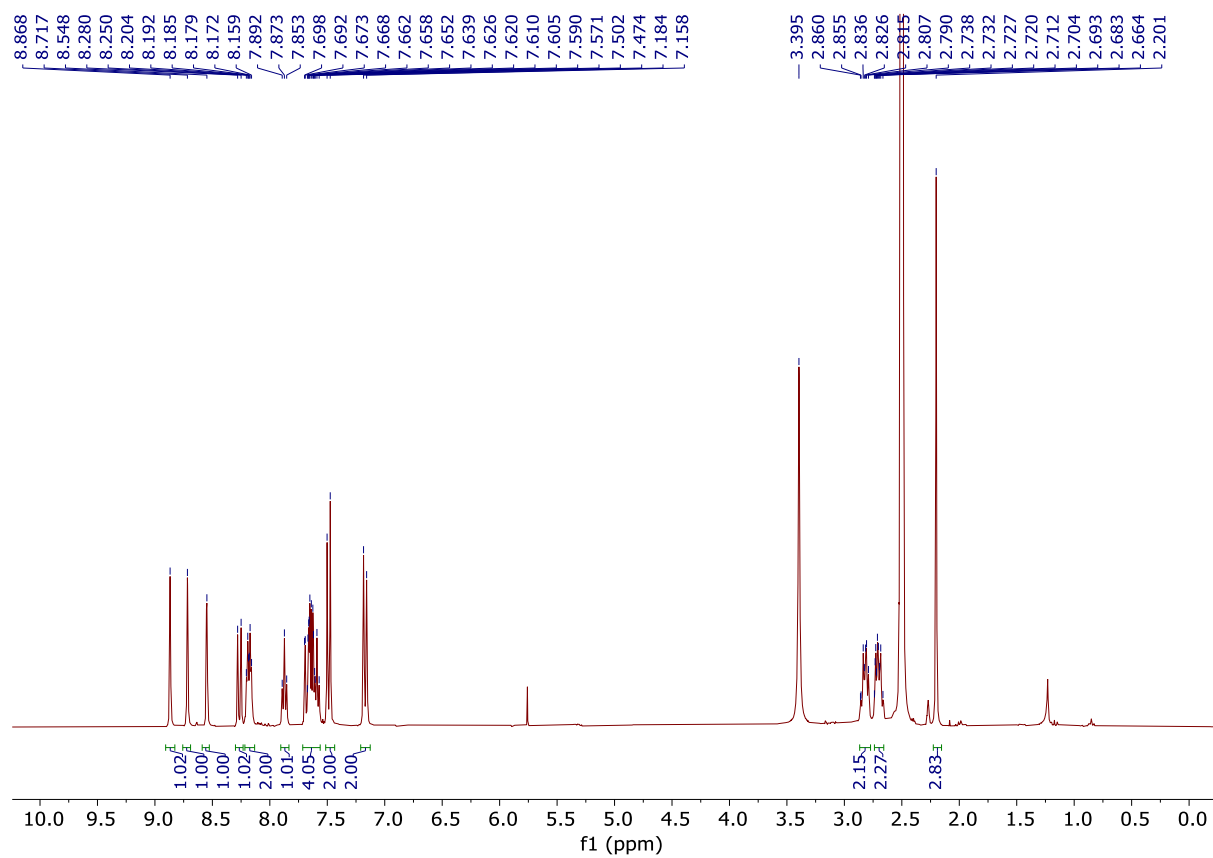

### <sup>1</sup>H NMR of I-2 (300 MHz, CDCl<sub>3</sub>)

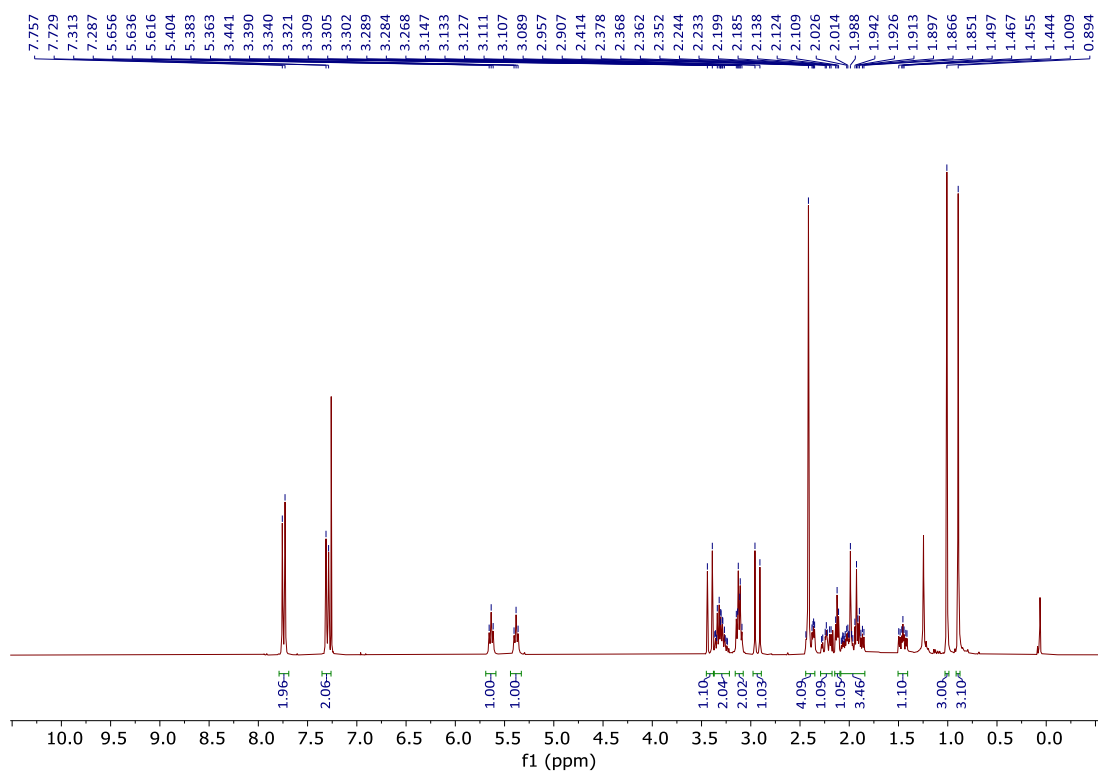

### <sup>13</sup>C NMR of I-2 (75 MHz, CDCl<sub>3</sub>)

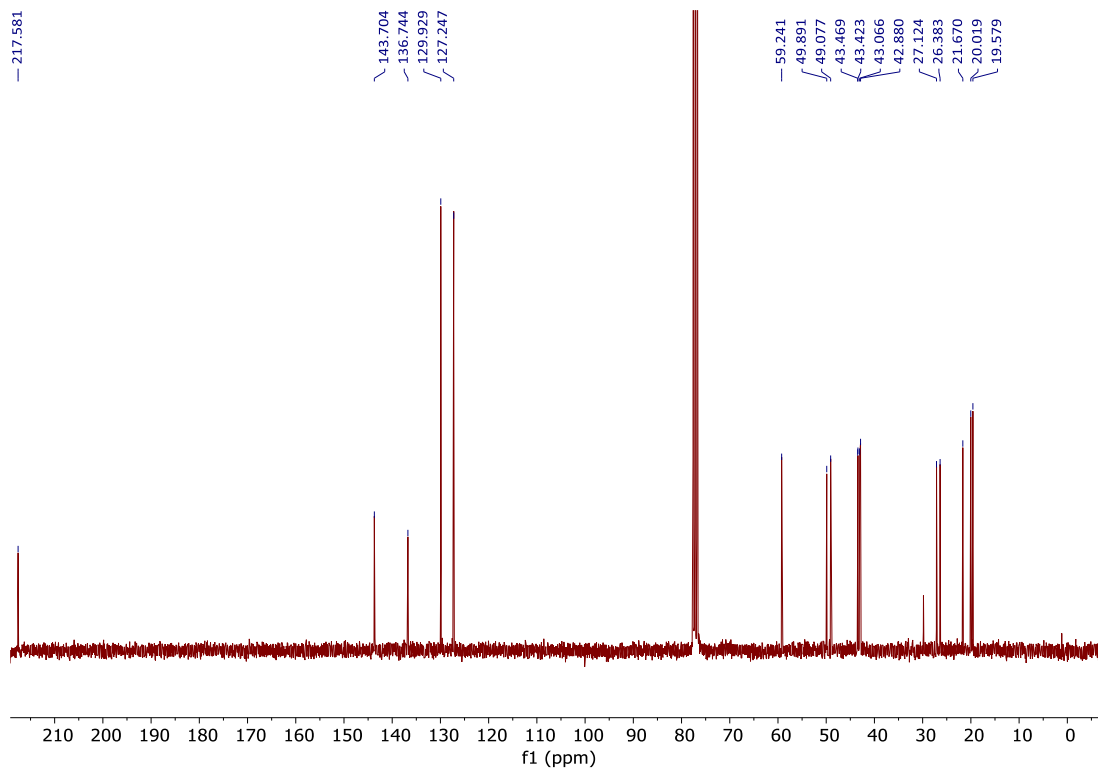

### <sup>1</sup>H NMR of I-3 (300 MHz, CDCl<sub>3</sub>)

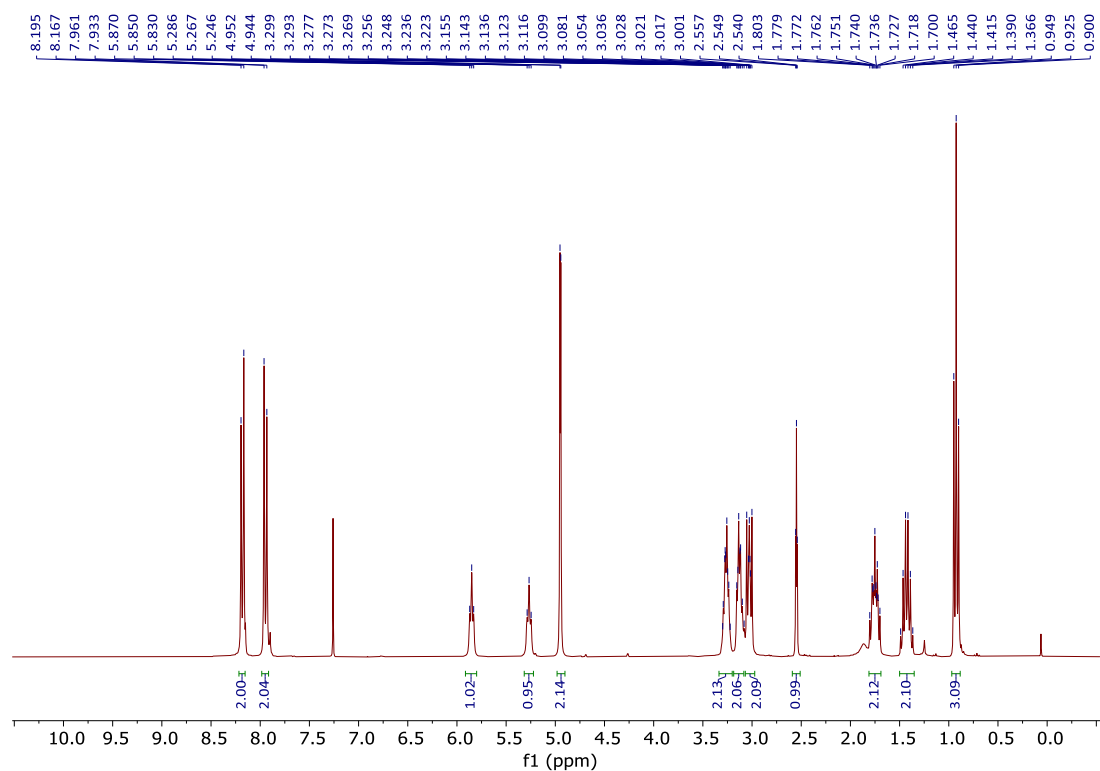

### <sup>13</sup>C NMR of I-3 (75 MHz, CDCl<sub>3</sub>)

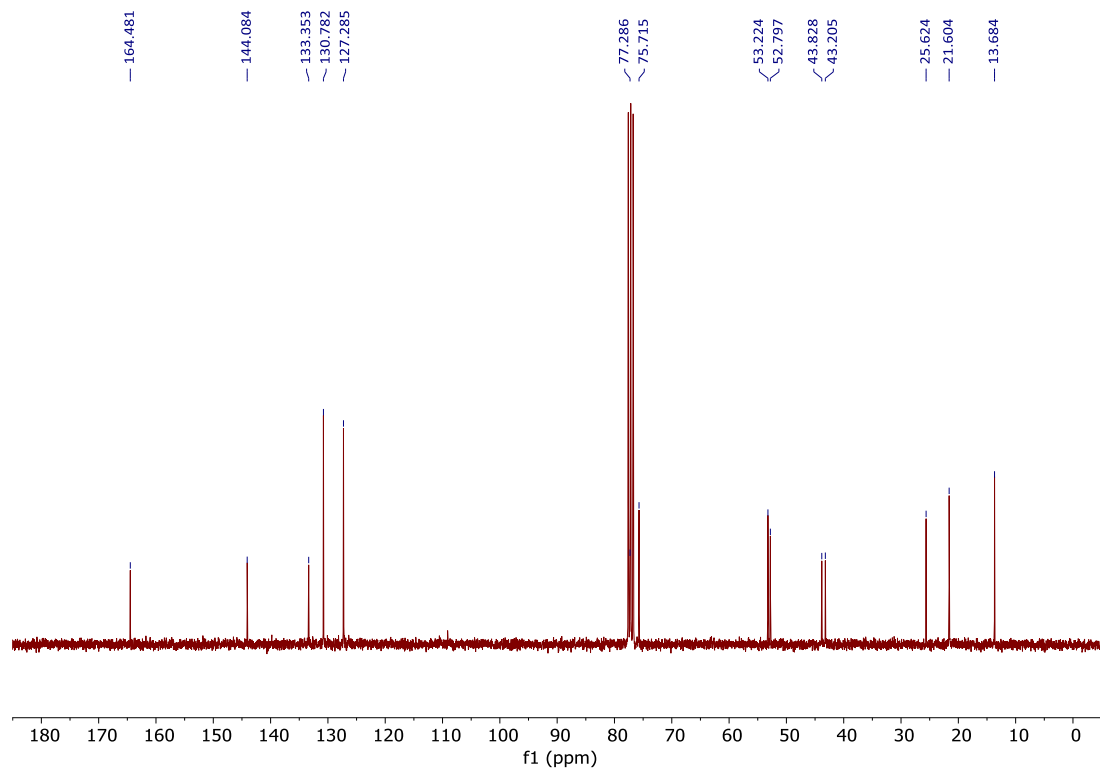

### <sup>1</sup>H NMR of I-4 (300 MHz, CDCl<sub>3</sub>)

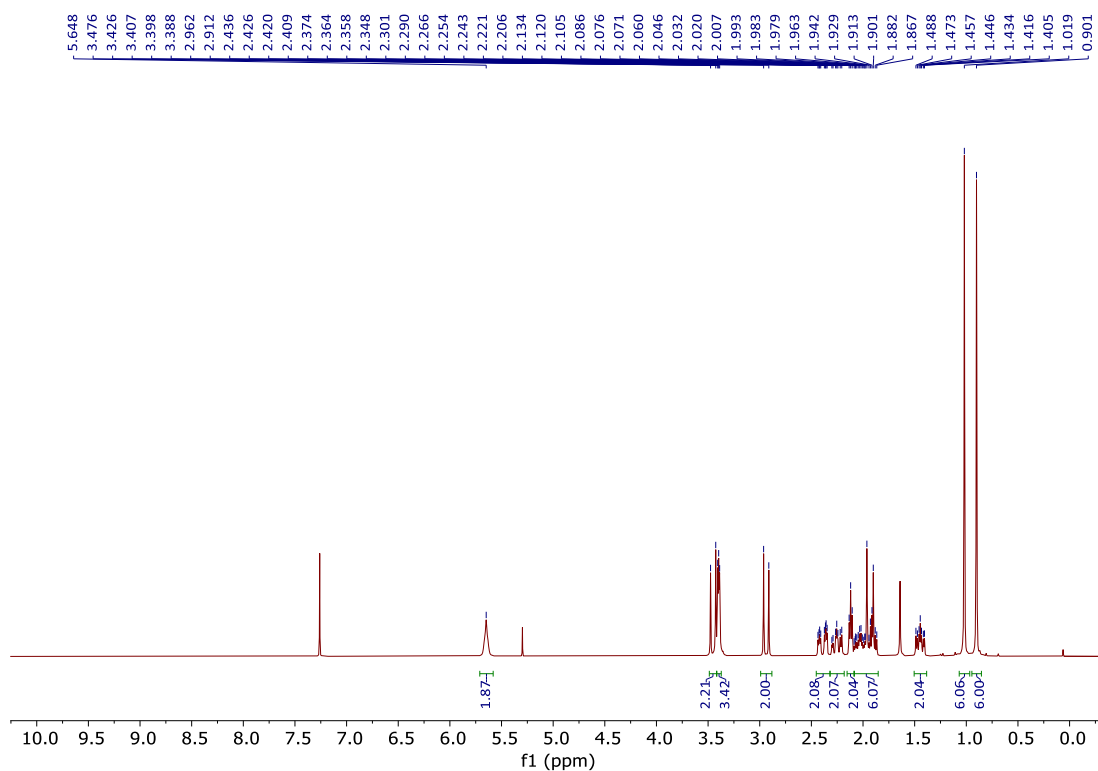

### <sup>13</sup>C NMR of I-4 (75 MHz, CDCl<sub>3</sub>)

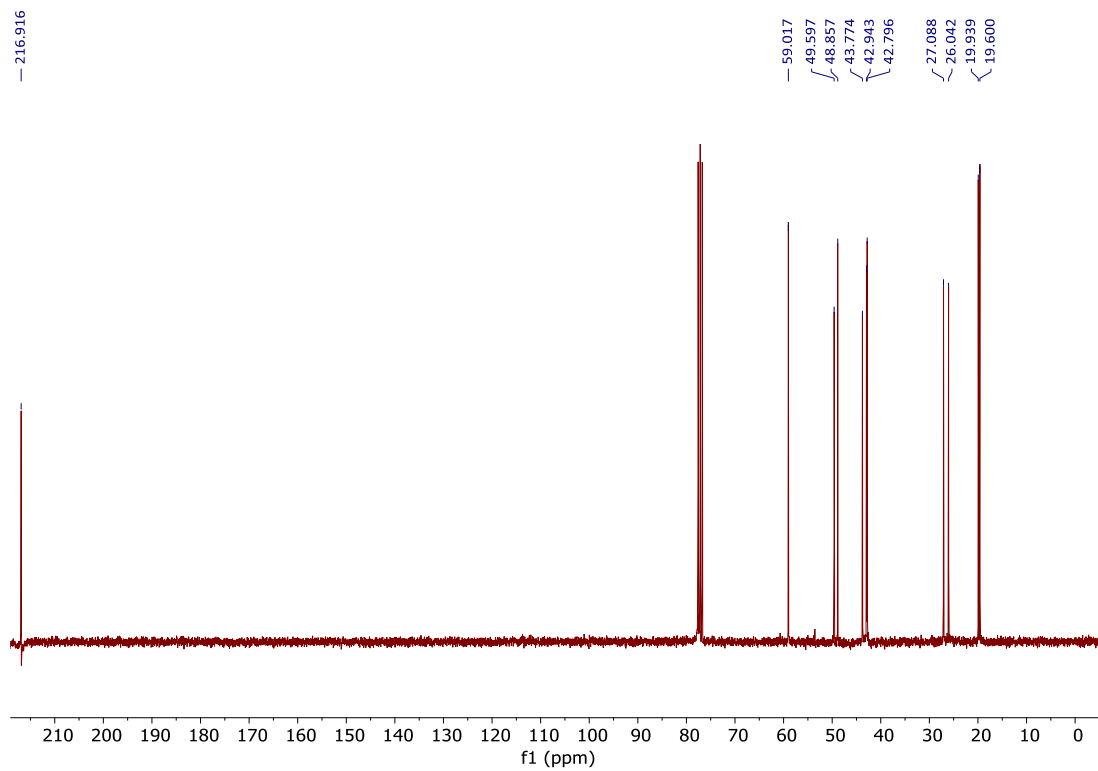



**<sup>1</sup>H NMR of NBDP-2 (300 MHz, CDCl<sub>3</sub>):**

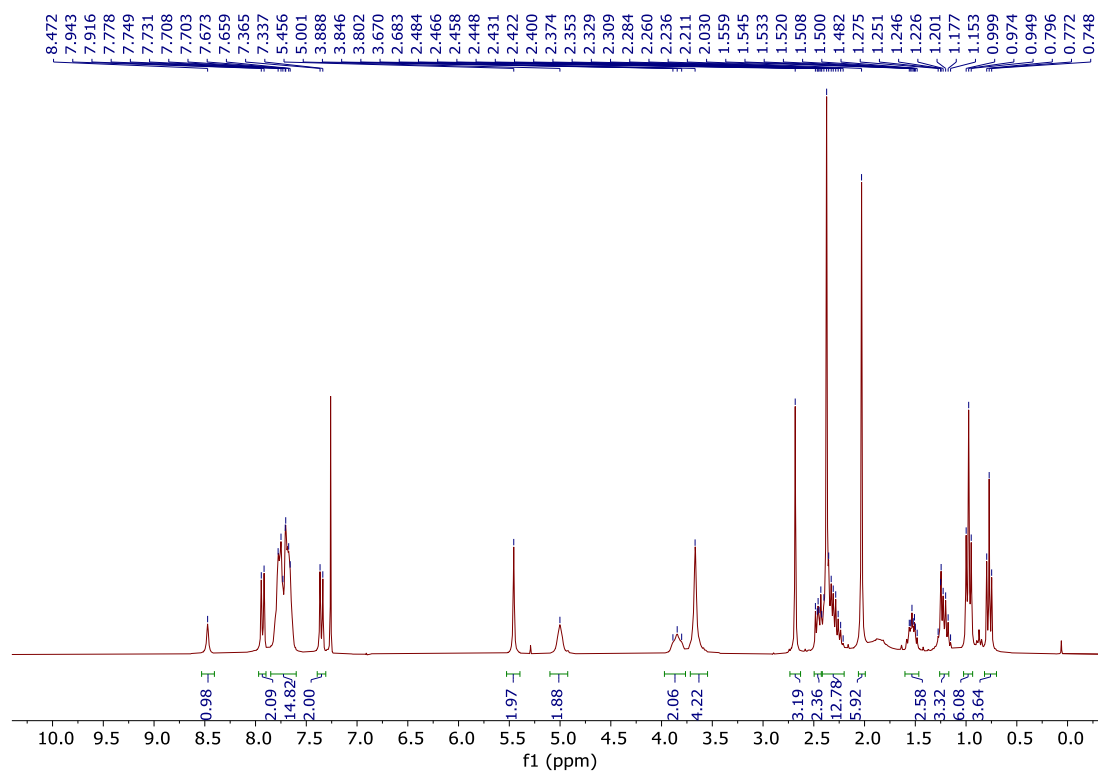

**<sup>13</sup>C NMR of NBDP-2 (75 MHz, CDCl<sub>3</sub>):**

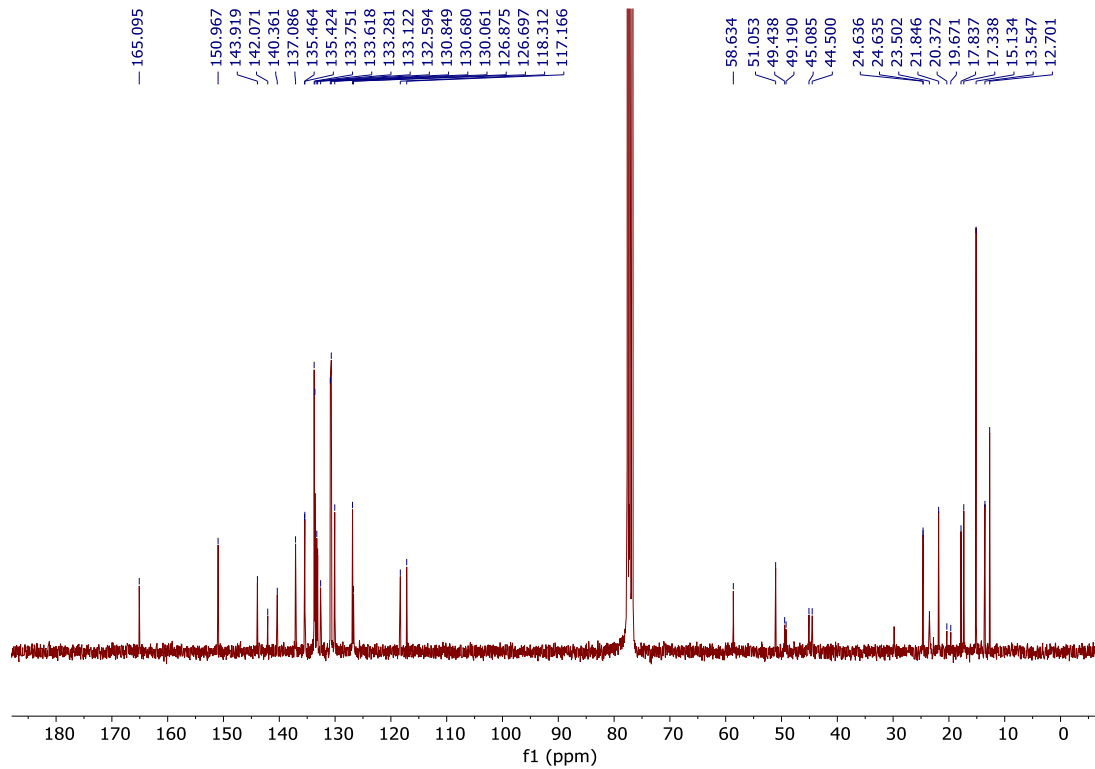

**$^{11}\text{B}$  NMR of NBDP-2 (160 MHz,  $\text{CDCl}_3$ ):**

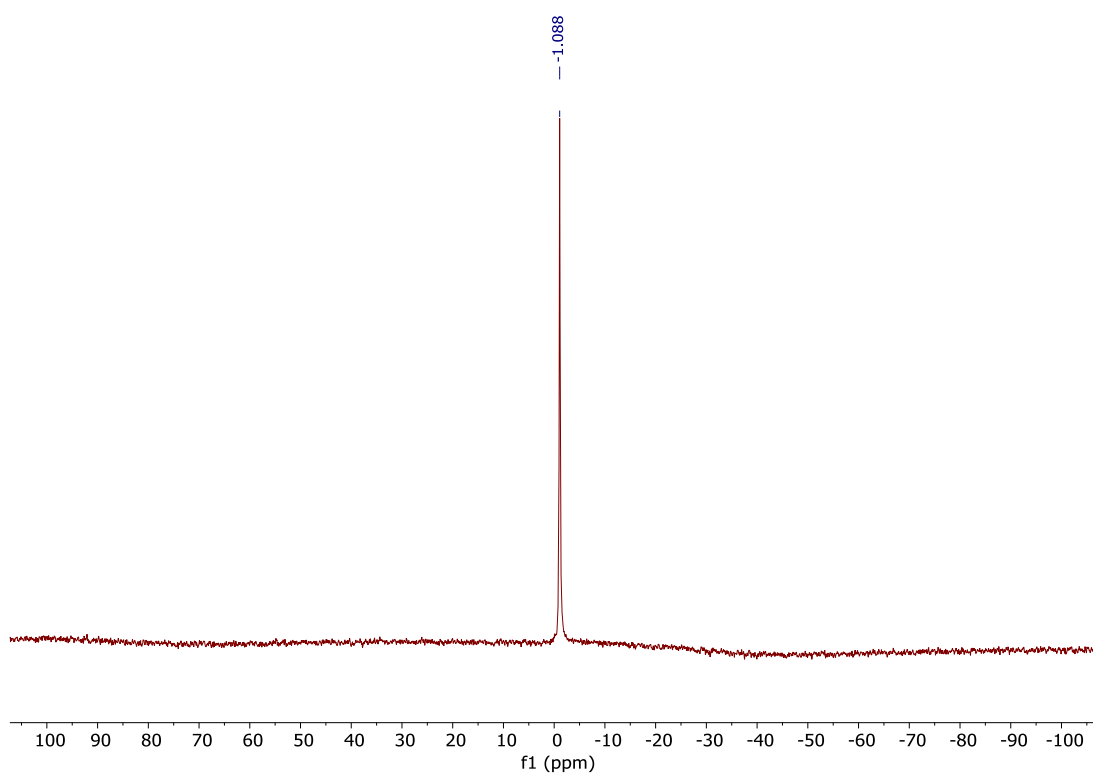

**$^{31}\text{P}$  NMR of NBDP-2 (121 MHz,  $\text{CDCl}_3$ ):**

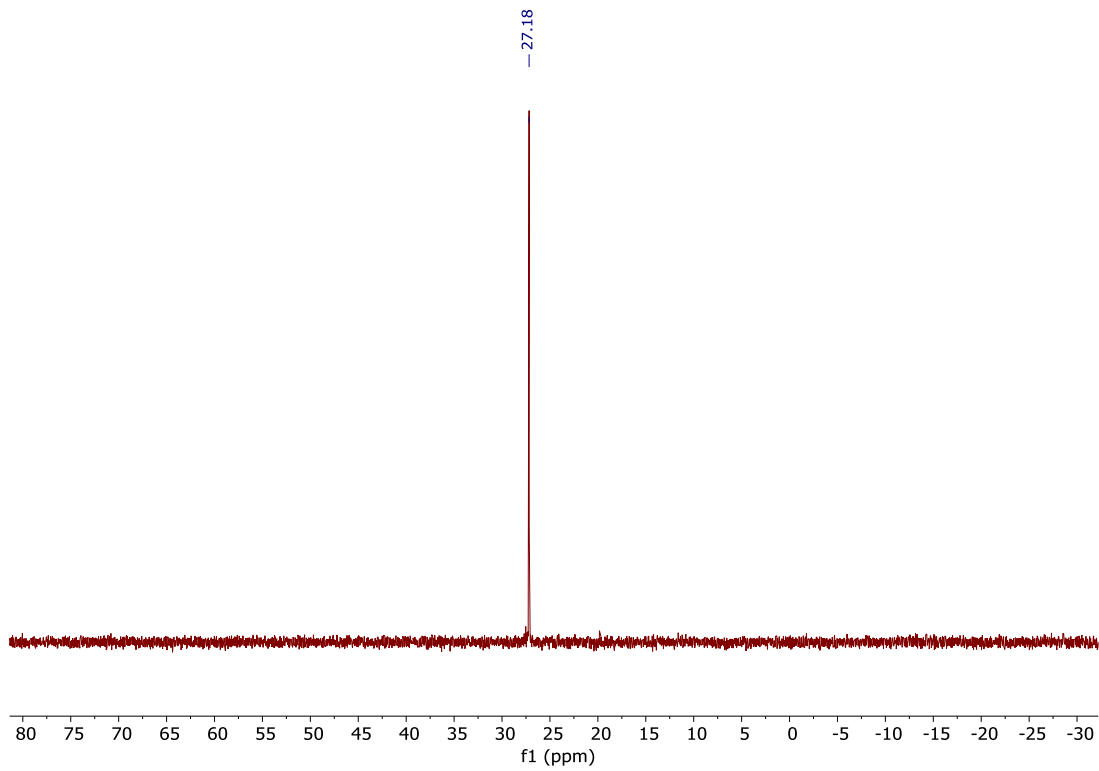

**<sup>1</sup>H NMR of NBDP-3 (300 MHz, CDCl<sub>3</sub>):**

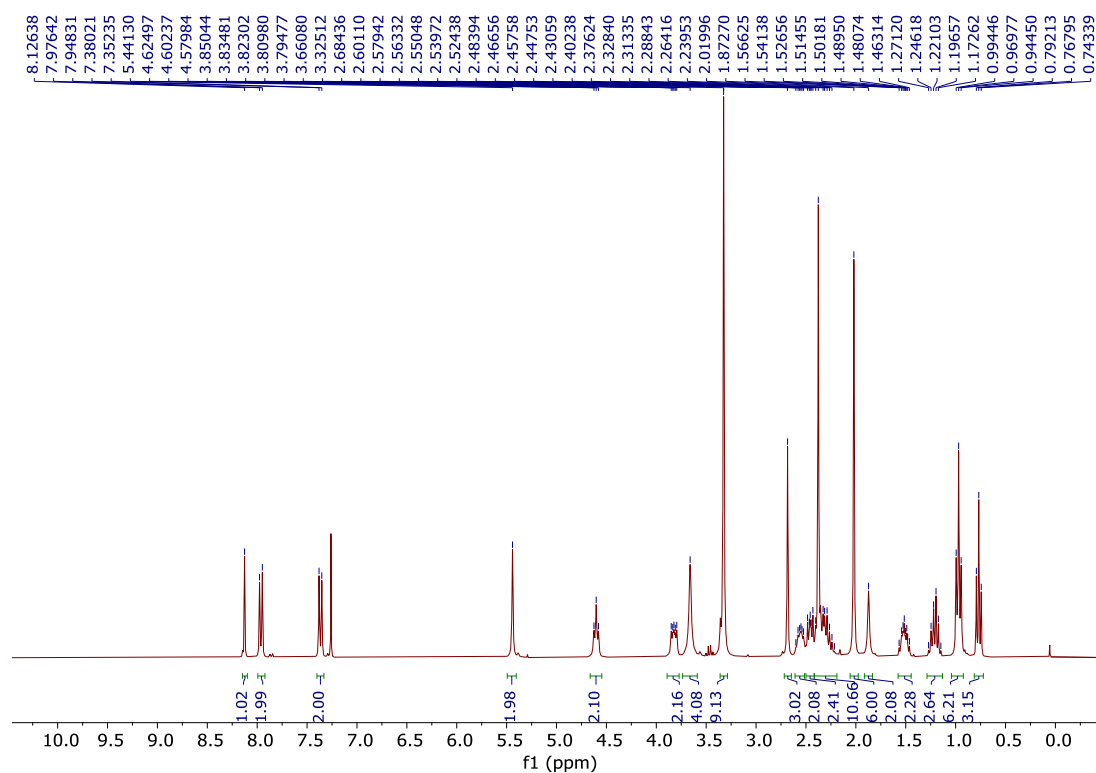

**<sup>13</sup>C NMR of NBDP-3 (75 MHz, CDCl<sub>3</sub>):**

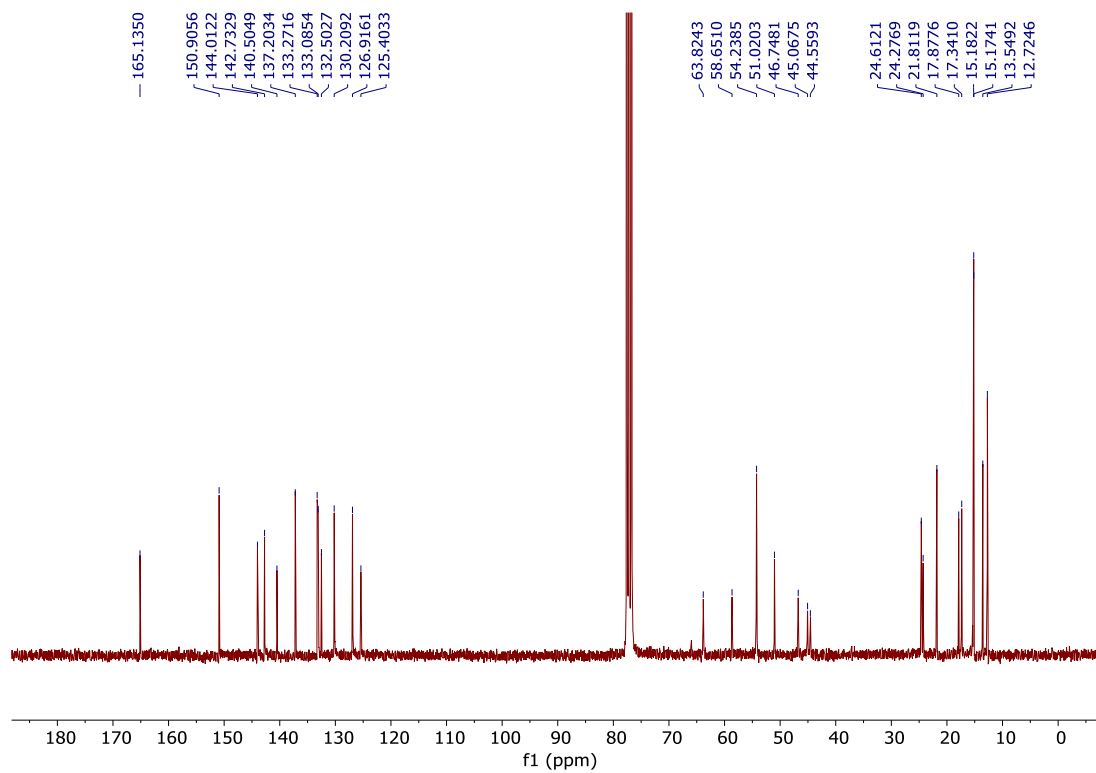

**$^{11}\text{B}$  NMR of NBDP-3 (160 MHz,  $\text{CDCl}_3$ ):**

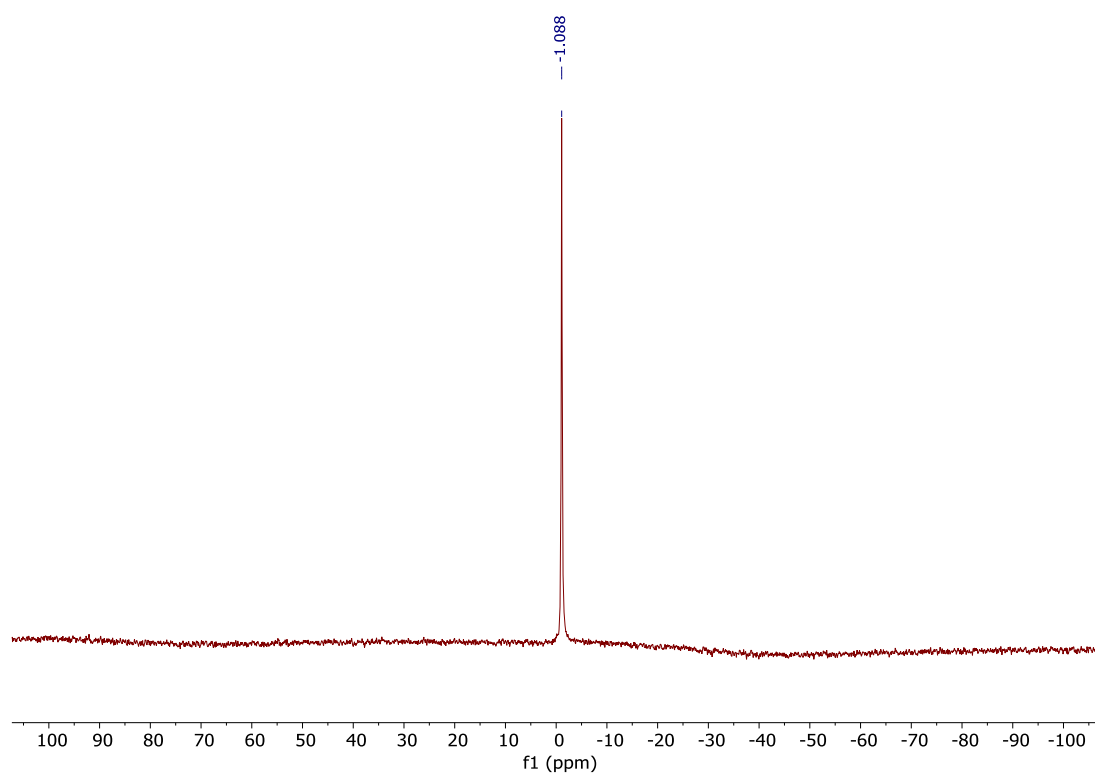

**<sup>1</sup>H NMR of NBDP-4 (300 MHz, CDCl<sub>3</sub>):**

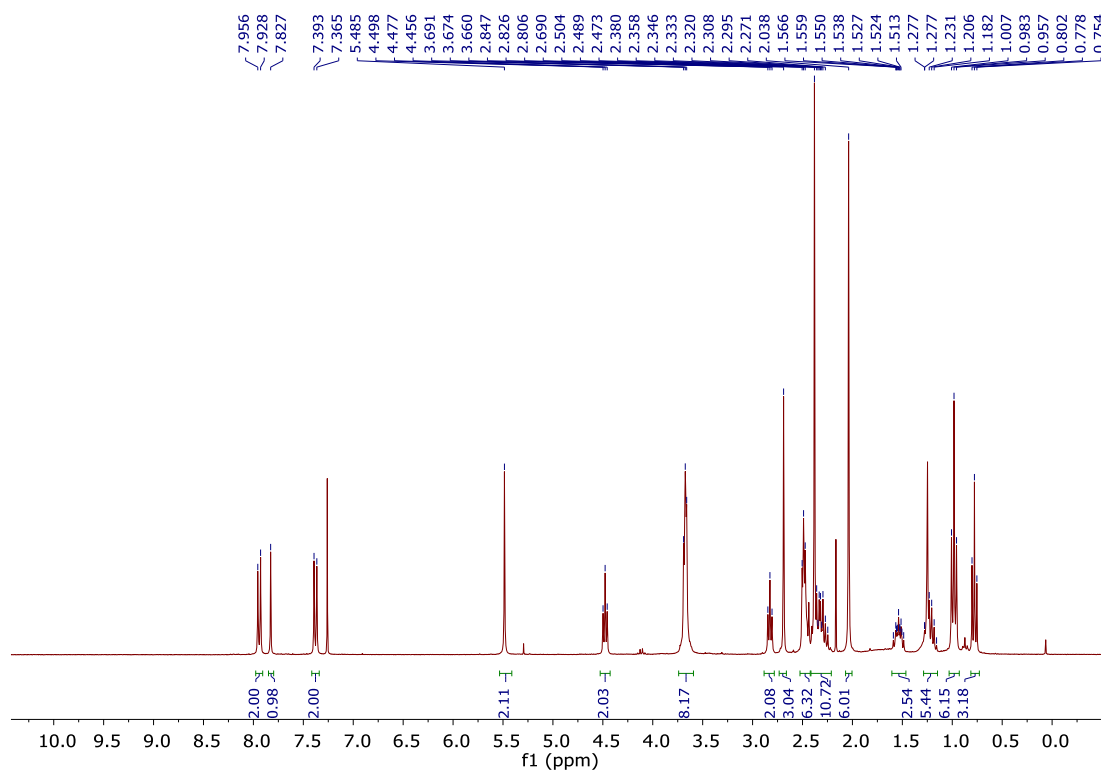

**<sup>13</sup>C NMR of NBDP-4 (75 MHz, CDCl<sub>3</sub>):**

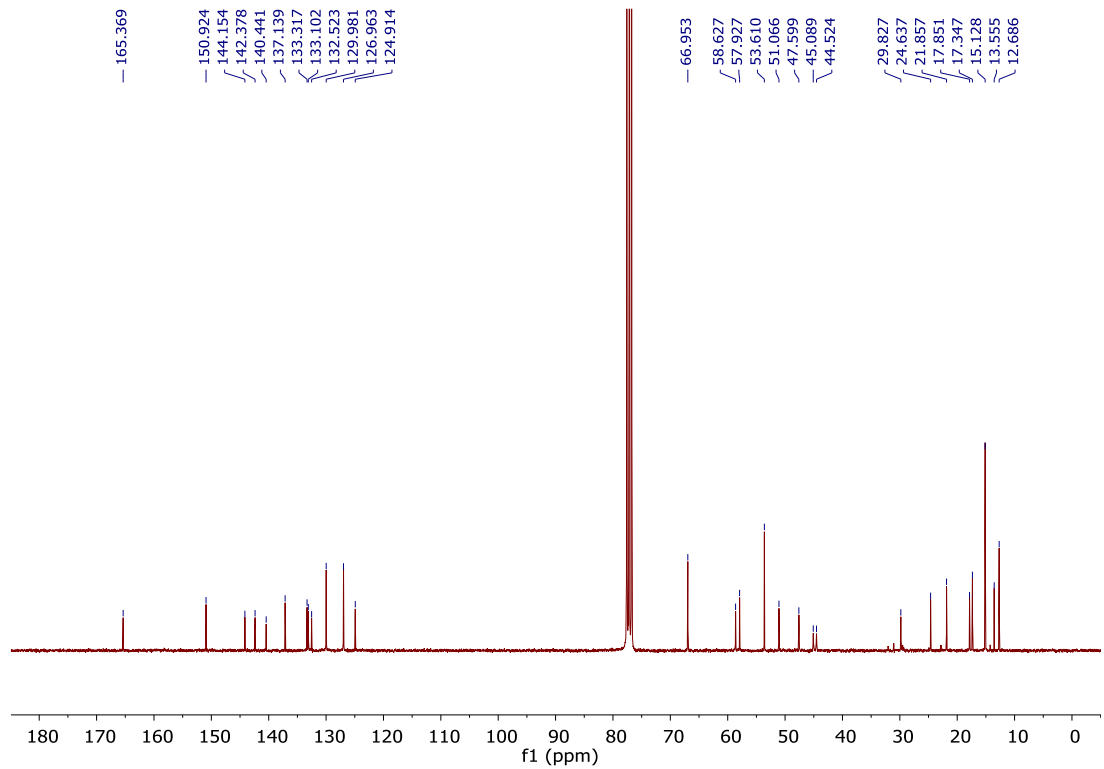

**$^{11}\text{B}$  NMR of NBDP-4 (160 MHz,  $\text{CDCl}_3$ ):**

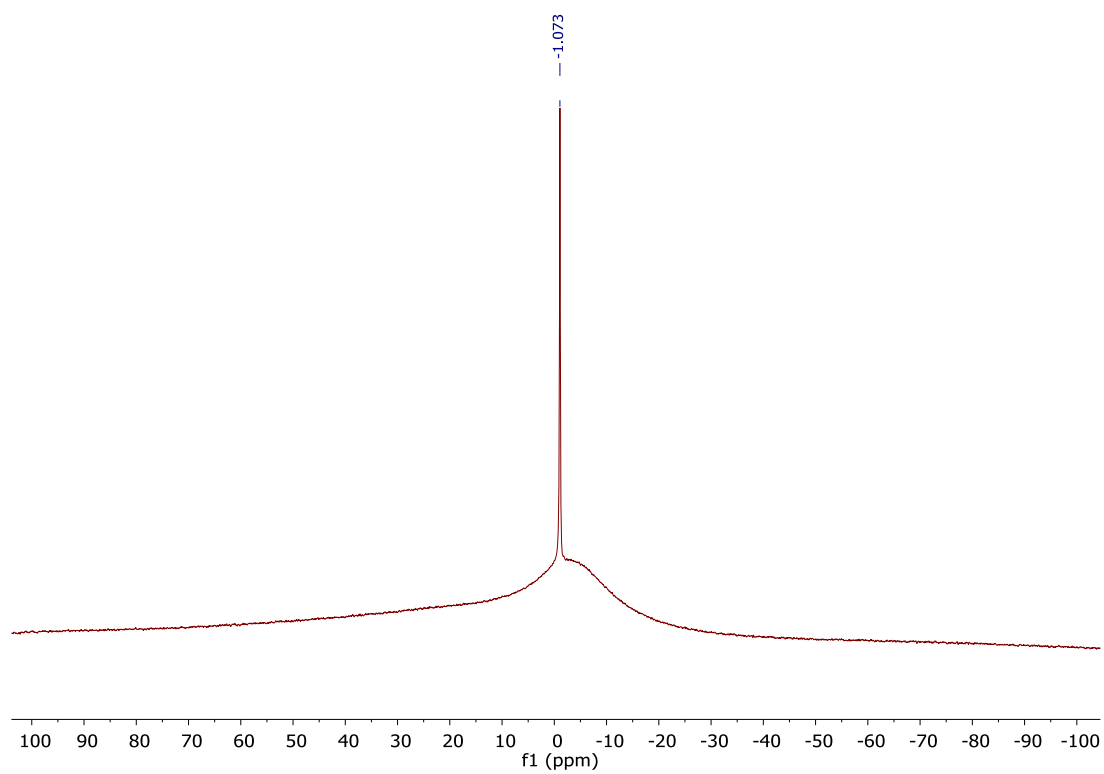

**<sup>1</sup>H NMR of NBDP-5 (300 MHz, CDCl<sub>3</sub>):**

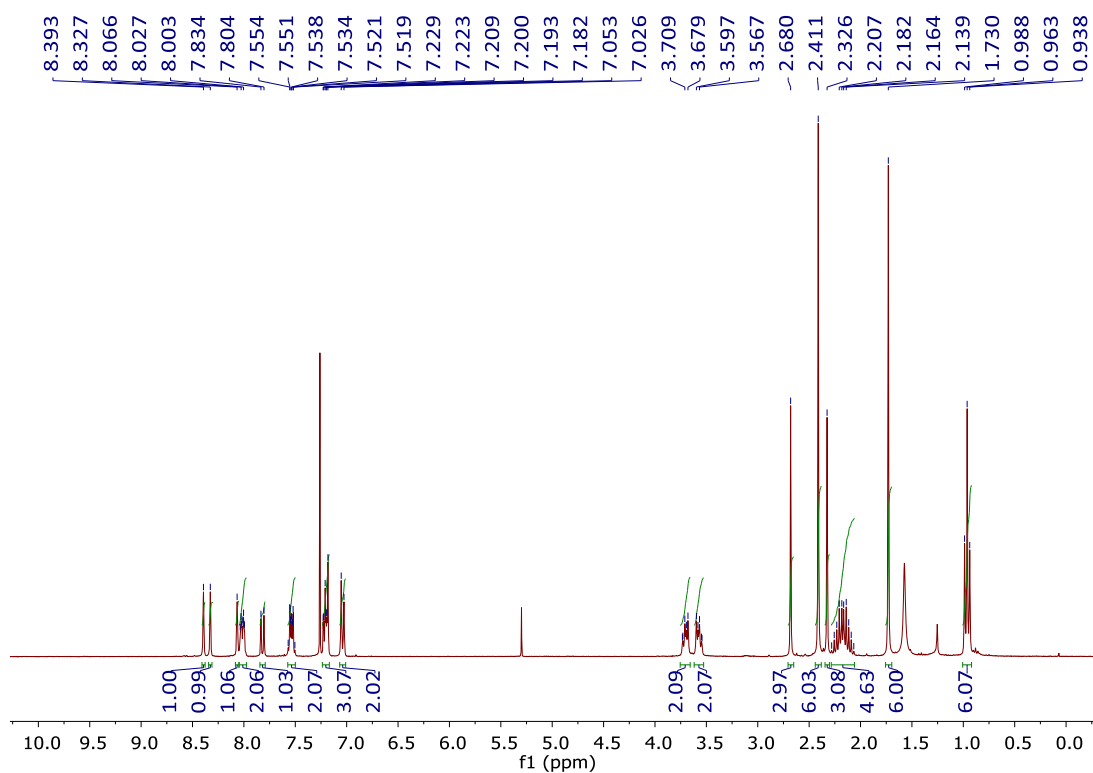

**<sup>13</sup>C NMR of NBDP-5 (75 MHz, CDCl<sub>3</sub>):**

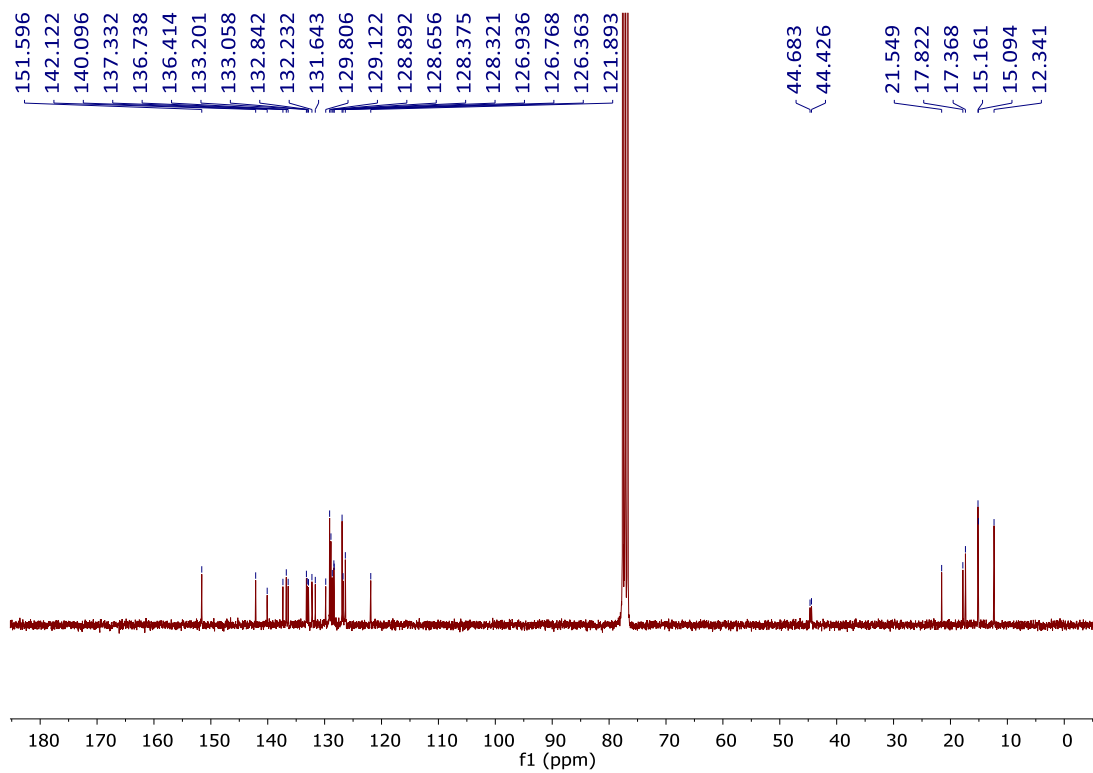

**$^{11}\text{B}$  NMR of NBDP-5 (160 MHz,  $\text{CDCl}_3$ ):**

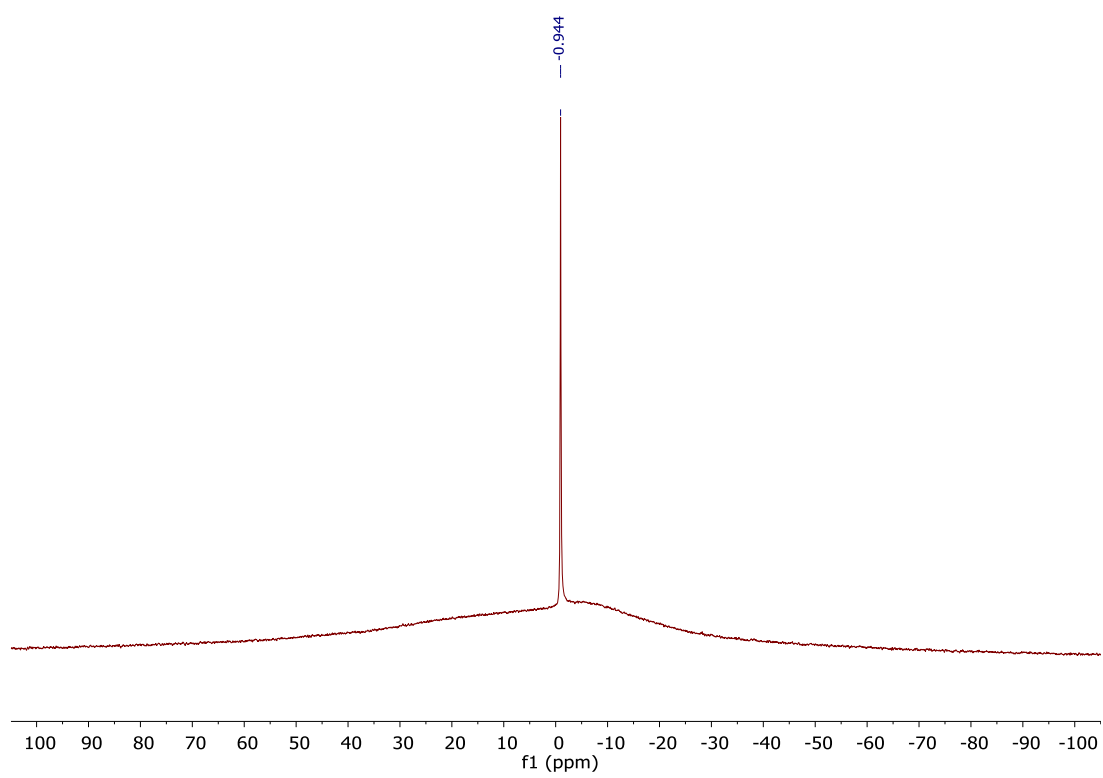



**<sup>1</sup>H NMR of NBDP-6 (300 MHz, CDCl<sub>3</sub>):**

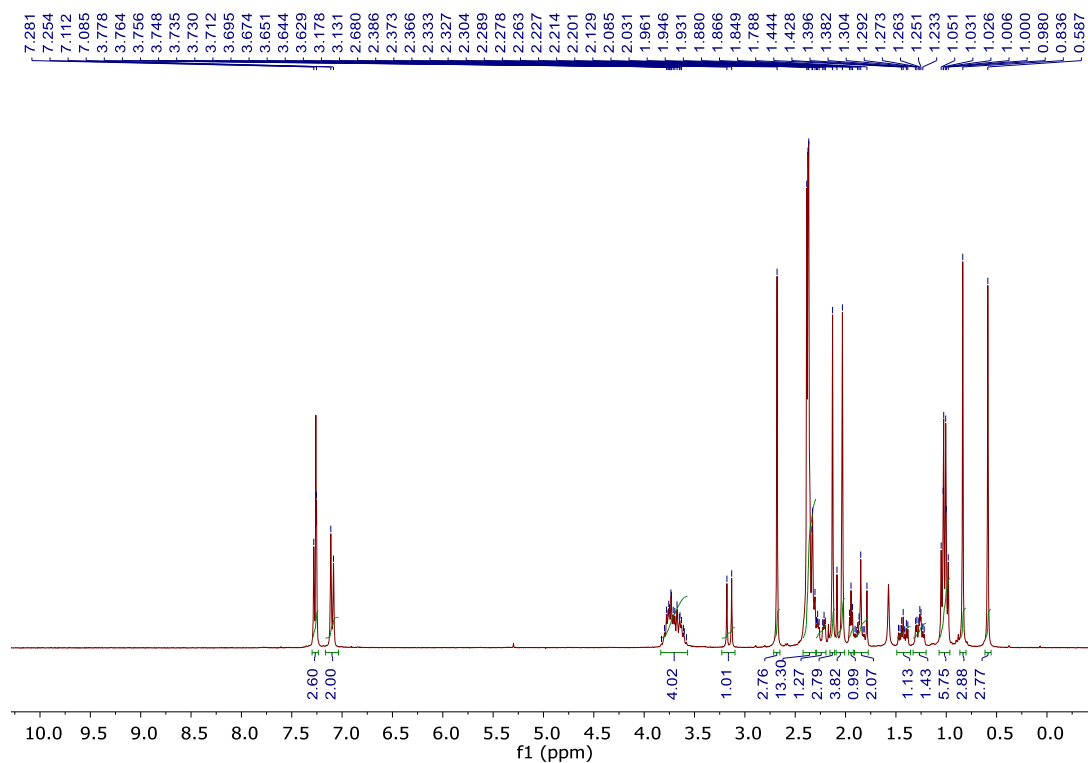

**<sup>13</sup>C NMR of NBDP-6 (75 MHz, CDCl<sub>3</sub>):**

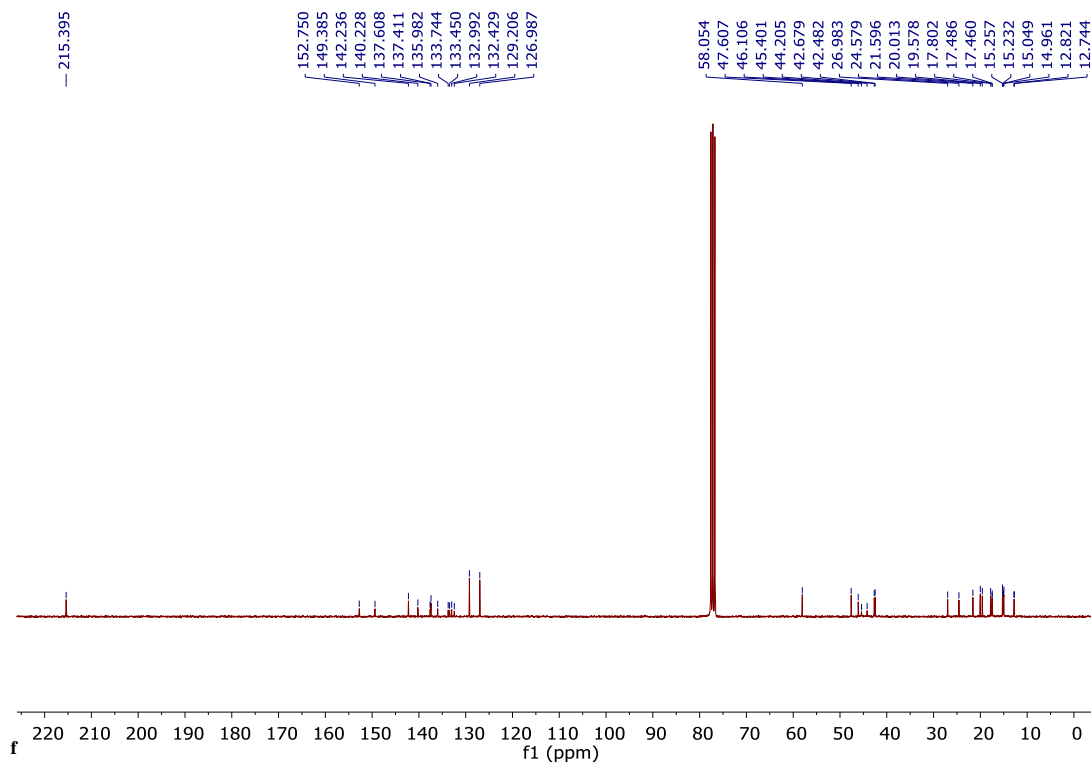

**$^{11}\text{B}$  NMR of NBDP-6 (160 MHz,  $\text{CDCl}_3$ ):**

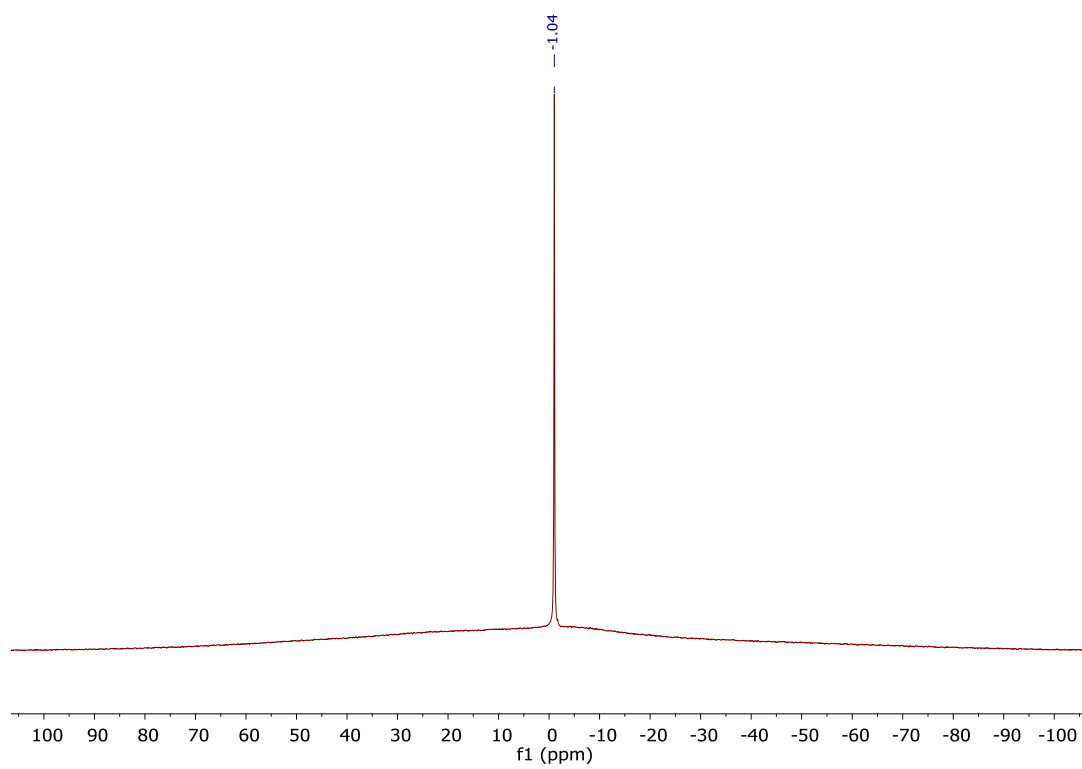

**<sup>1</sup>H NMR of NBDP-7-R (300 MHz, CDCl<sub>3</sub>):**

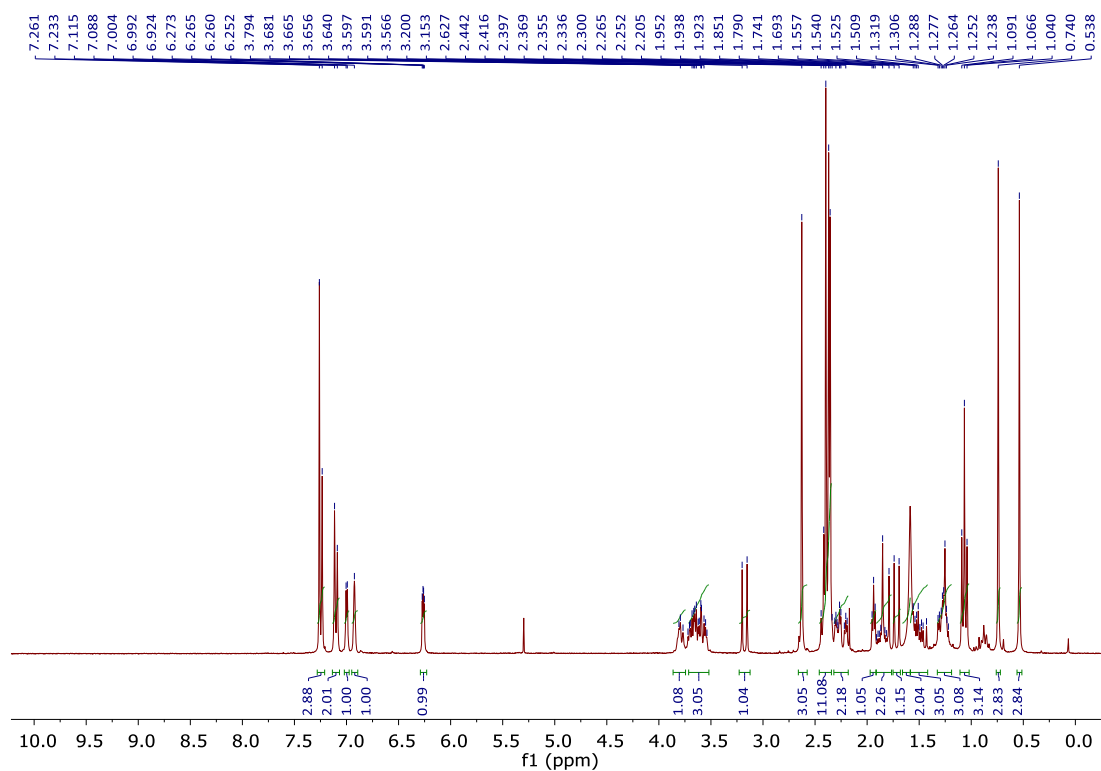

**<sup>13</sup>C NMR of NBDP-7-R (75 MHz, CDCl<sub>3</sub>):**

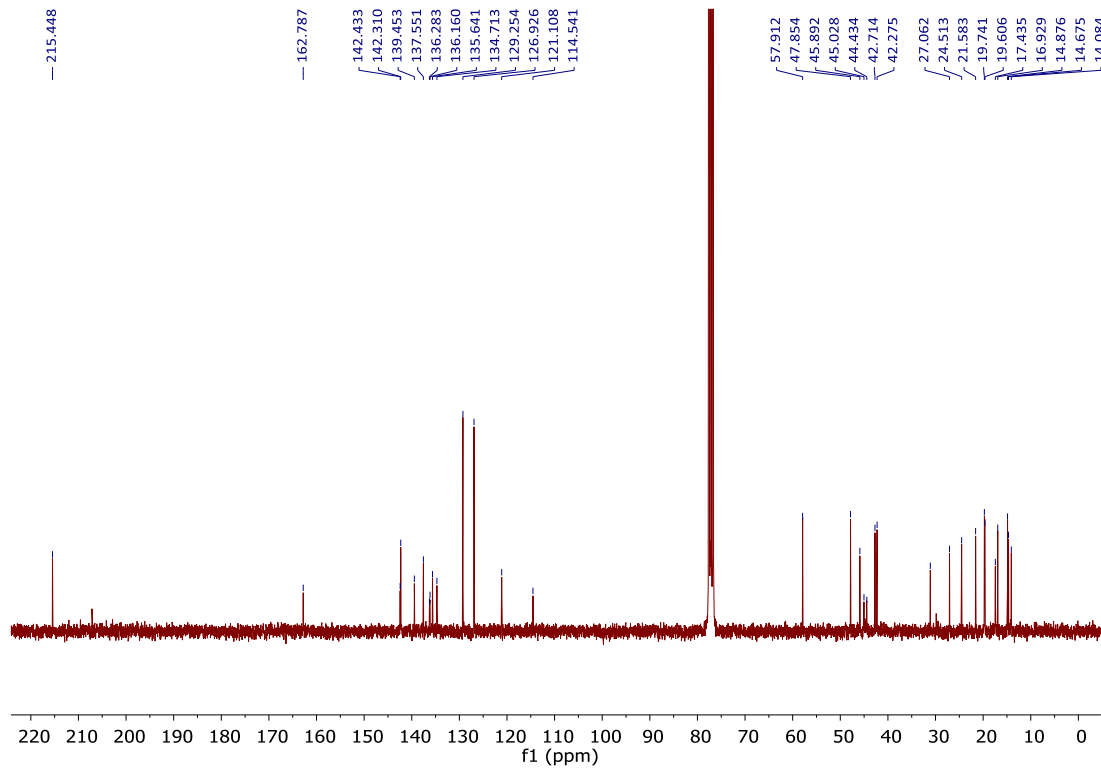

**$^{11}\text{B}$  NMR of NBDP-7-R (160 MHz,  $\text{CDCl}_3$ ):**

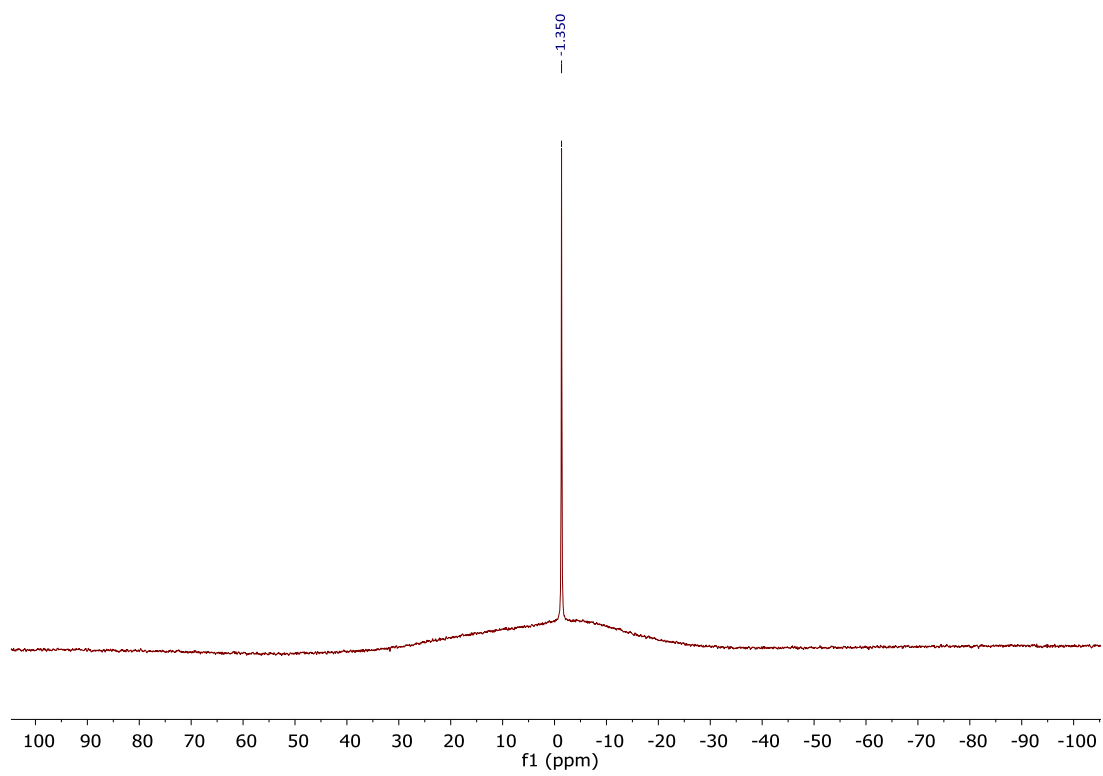

### <sup>1</sup>H NMR of NBDP-7-S (300 MHz, CDCl<sub>3</sub>):

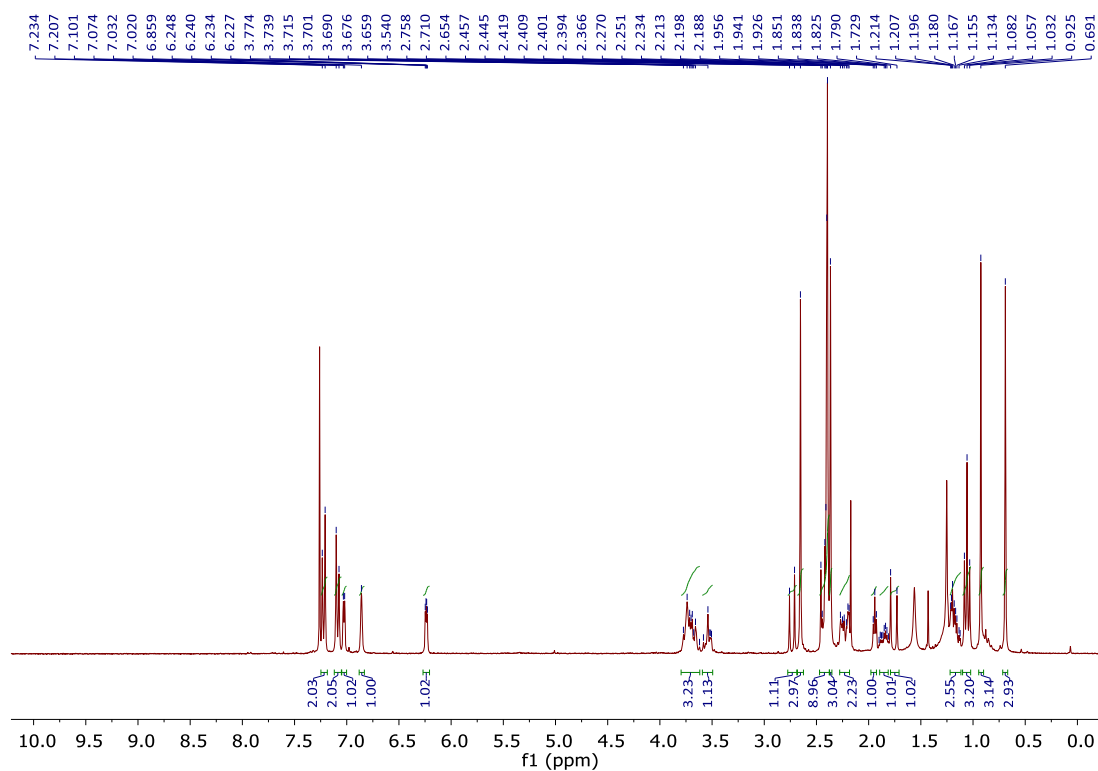

### <sup>13</sup>C NMR of NBDP-7-S (75 MHz, CDCl<sub>3</sub>)

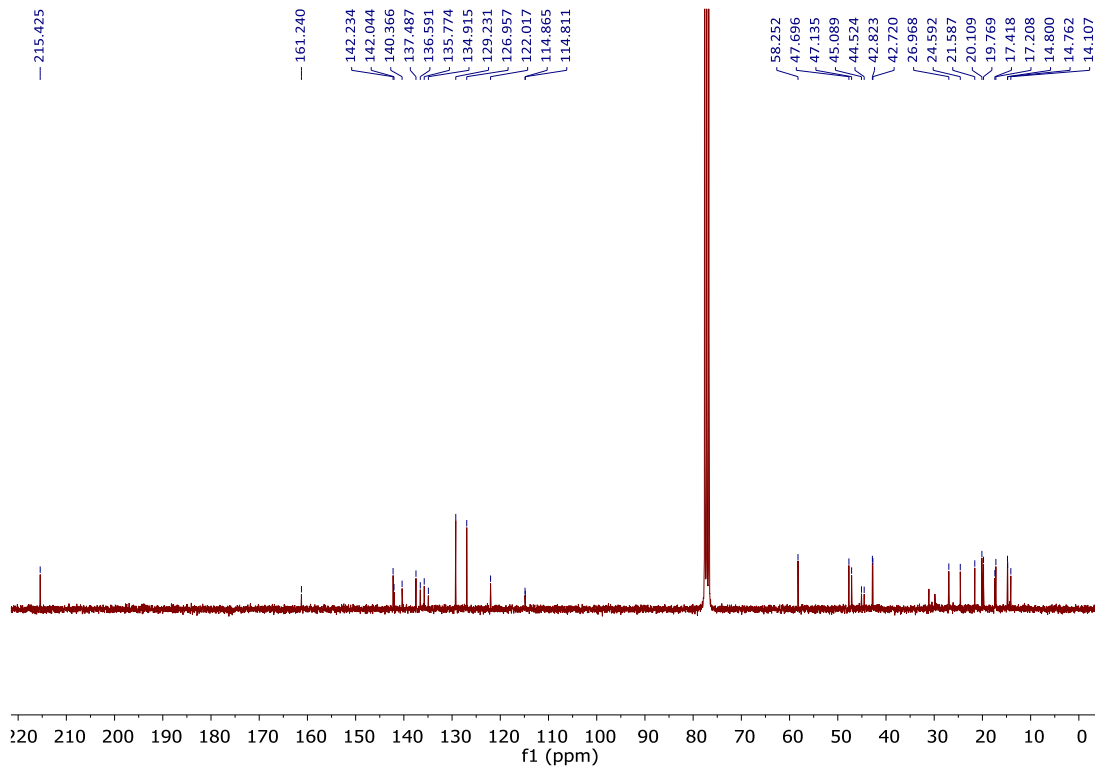

**$^{11}\text{B}$  NMR of NBDP-7-S (160 MHz,  $\text{CDCl}_3$ ):**

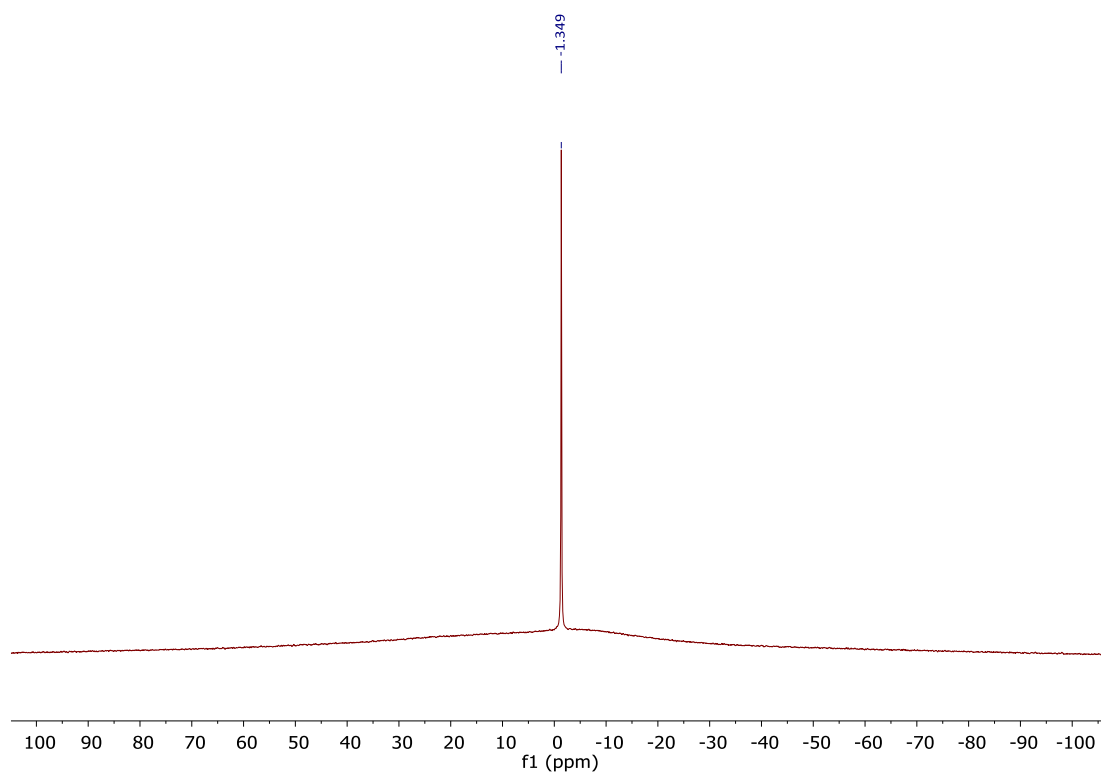

**<sup>1</sup>H NMR of NBDP-8 (300 MHz, CDCl<sub>3</sub>):**

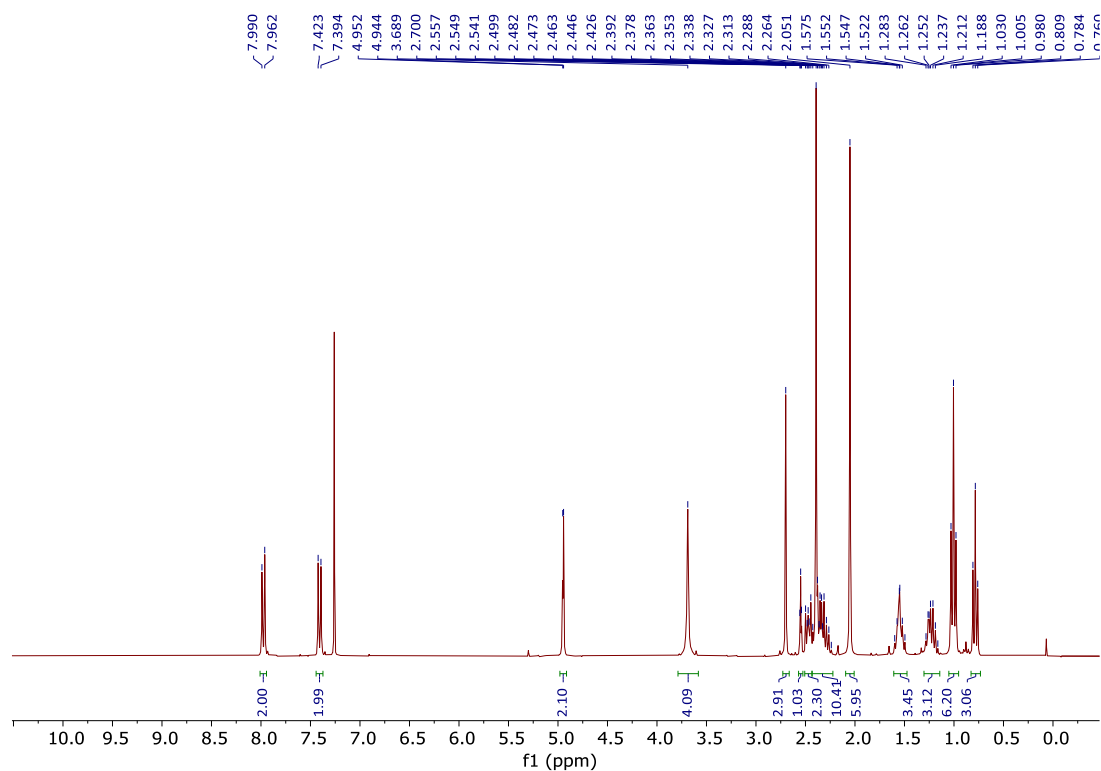

**<sup>13</sup>C NMR of NBDP-8 (75 MHz, CDCl<sub>3</sub>):**

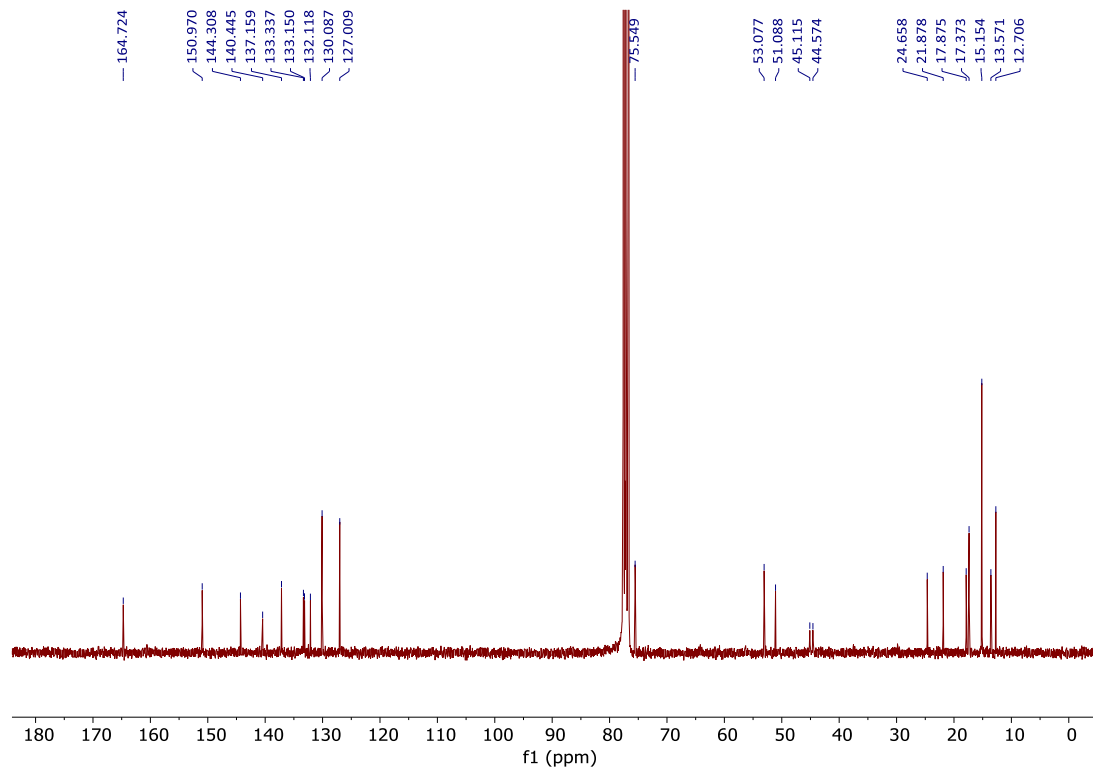

**$^{11}\text{B}$  NMR of NBDP-8 (160 MHz,  $\text{CDCl}_3$ ):**

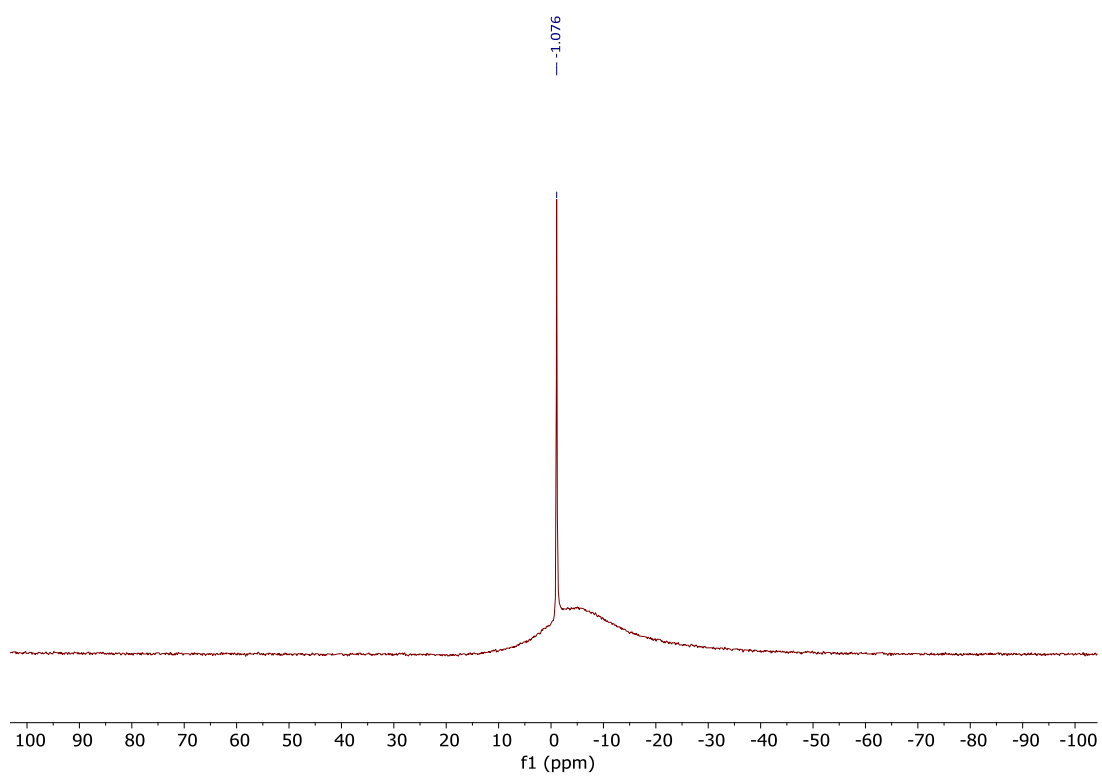



**<sup>1</sup>H NMR of NBDP-9 (300 MHz, CDCl<sub>3</sub>):**

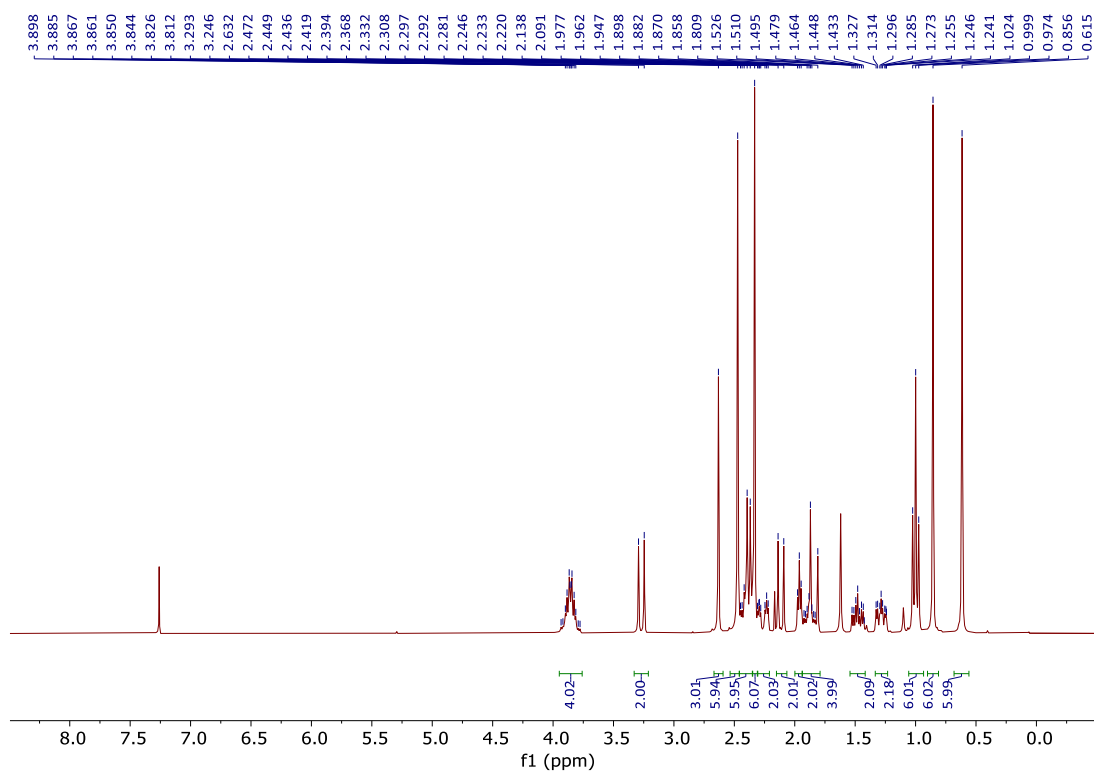

**<sup>13</sup>C NMR of NBDP-9 (75 MHz, CDCl<sub>3</sub>):**

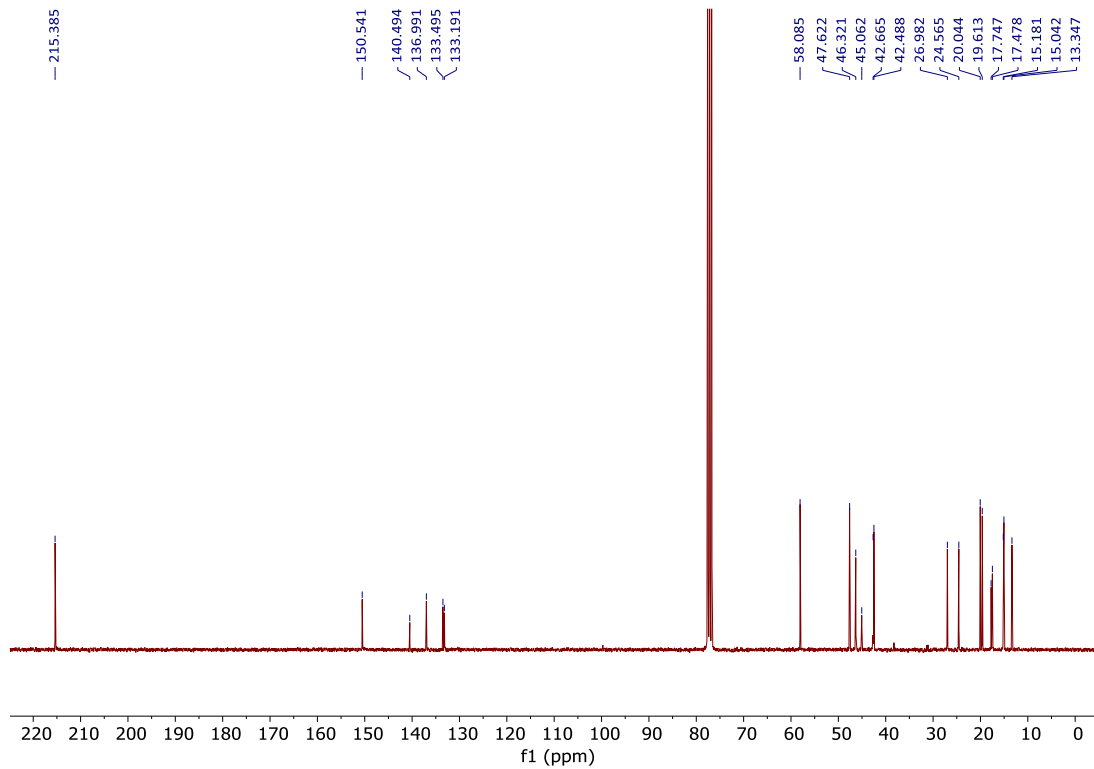

**$^{11}\text{B}$  NMR of NBDP-9 (160 MHz,  $\text{CDCl}_3$ ):**

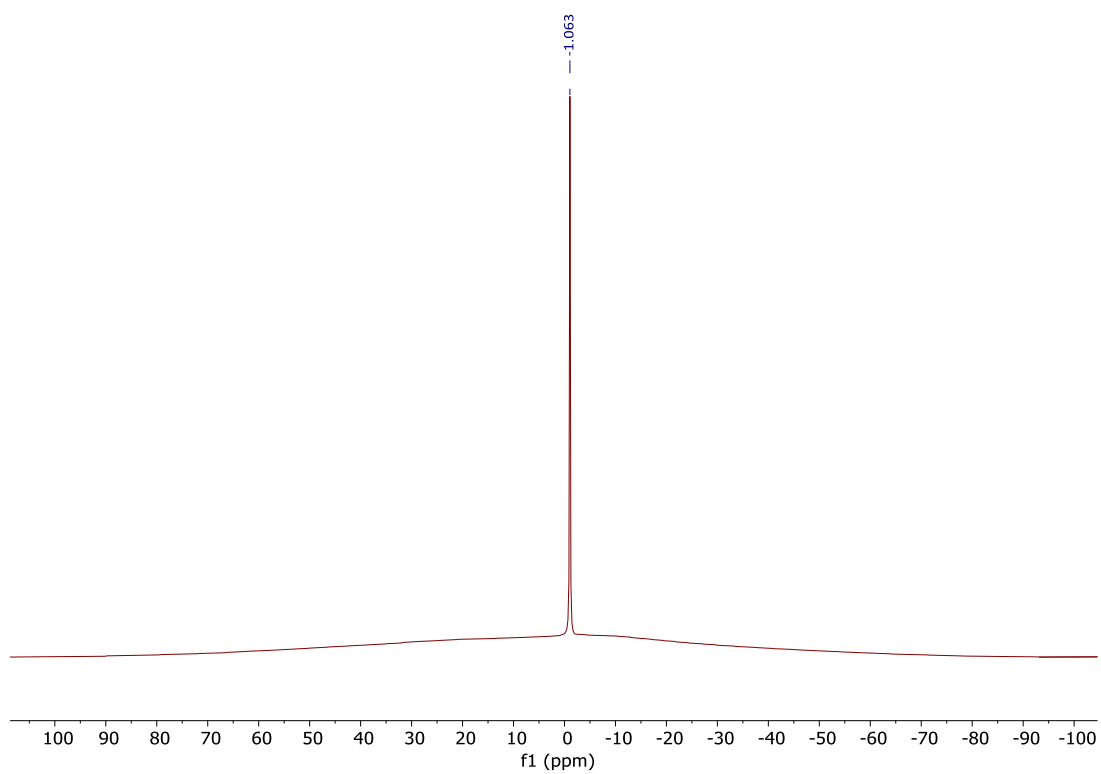

## S4. Tables

**Table S1.** Ground visible photophysical signatures of new *N*-BODIPYs in different solvents (*ca.*  $2 \times 10^{-6}$  M) and precursor *F*-BODIPYs. Previously reported data for **NBDP-1** are included for comparison purposes.

| Dye                         | Solvent           | $\lambda_{ab}^a$<br>(nm) | $\epsilon_{max}^b$<br>( $10^4 \times M^{-1}cm^{-1}$ ) | $\lambda_{fl}^c$<br>(nm) | $\phi^d$ | $\tau^e$<br>(ns) |
|-----------------------------|-------------------|--------------------------|-------------------------------------------------------|--------------------------|----------|------------------|
| <b>FBDP-1</b>               | <i>c</i> -hex     | 523.0                    | 8.7                                                   | 539.0                    | 0.88     | 5.60             |
|                             | EtOAc             | 517.0                    | 7.6                                                   | 533.0                    | 0.84     | 5.78             |
|                             | MeOH              | 516.0                    | 7.4                                                   | 534.0                    | 0.81     | 6.10             |
| <b>NBDP-1<sup>f</sup></b>   | <i>c</i> -hex     | 529.0                    | 7.0                                                   | 544.5                    | 0.94     | 7.14             |
|                             | EtOAc             | 526.5                    | 6.5                                                   | 543.5                    | 0.83     | 7.65             |
|                             | MeOH              | 525.5                    | 6.2                                                   | 542.0                    | 0.82     | 8.37             |
| <b>NBDP-2<sup>g,h</sup></b> | MeOH              | 524.5                    | 5.1                                                   | 544.0                    | 0.80     | 7.77             |
| <b>NBDP-3<sup>g,h</sup></b> | MeOH              | 524.5                    | 5.2                                                   | 541.5                    | 0.73     | 7.76             |
| <b>NBDP-4<sup>g</sup></b>   | EtOAc             | 525.0                    | 4.7                                                   | 545.5                    | 0.80     | 7.49             |
|                             | MeOH              | 524.5                    | 5.5                                                   | 543.5                    | 0.88     | 7.82             |
| <b>NBDP-5</b>               | <i>c</i> -hex     | 527.0                    | 6.6                                                   | 545.5                    | 0.85     | 6.84             |
|                             | EtOAc             | 523.5                    | 5.0                                                   | 540.5                    | 0.80     | 7.19             |
|                             | MeOH              | 522.5                    | 6.2                                                   | 538.0                    | 0.80     | 7.93             |
| <b>NBDP-6</b>               | <i>c</i> -hex     | 528.0                    | 5.4                                                   | 546.5                    | 0.78     | 7.10             |
|                             | CHCl <sub>3</sub> | 527.5                    | 5.6                                                   | 543.5                    | 0.88     | 7.22             |
|                             | MeOH              | 524.0                    | 5.6                                                   | 541.5                    | 0.82     | 8.31             |
| <b>NBDP-8</b>               | <i>c</i> -hex     | 528.5                    | 5.3                                                   | 547.5                    | 0.80     | 7.09             |
|                             | EtOAc             | 525.0                    | 5.8                                                   | 542.5                    | 0.81     | 7.61             |
|                             | MeOH              | 524.5                    | 6.0                                                   | 542.5                    | 0.80     | 8.16             |
| <b>NBDP-9</b>               | <i>c</i> -hex     | 527.5                    | 5.2                                                   | 547.0                    | 0.96     | 7.06             |
|                             | EtOAc             | 524.0                    | 5.6                                                   | 542.0                    | 0.90     | 7.58             |
|                             | MeOH              | 523.0                    | 5.5                                                   | 542.0                    | 0.93     | 8.28             |
| <b>FBDP-2</b>               | <i>c</i> -hex     | 503.5                    | 5.7                                                   | 514.5                    | 0.93     | 5.52             |
|                             | CHCl <sub>3</sub> | 501.5                    | 4.0                                                   | 516.0                    | 0.97     | 5.50             |
|                             | MeOH              | 495.5                    | 4.3                                                   | 516.0                    | 0.80     | 5.80             |
| <b>NBDP-7-R</b>             | <i>c</i> -hex     | 504.5                    | 2.4                                                   | 522.0                    | 0.74     | 6.61             |
|                             | CHCl <sub>3</sub> | 504.5                    | 2.7                                                   | 520.0                    | 0.85     | 6.88             |
|                             | MeOH              | 502.5                    | 2.6                                                   | 519.5                    | 0.87     | 8.00             |
| <b>NBDP-7-S</b>             | <i>c</i> -hex     | 506.5                    | 2.6                                                   | 522.0                    | 0.71     | 6.26             |
|                             | CHCl <sub>3</sub> | 507.5                    | 2.2                                                   | 521.0                    | 0.70     | 6.49             |
|                             | MeOH              | 504.5                    | 2.8                                                   | 520.5                    | 0.82     | 7.56             |

<sup>a</sup>Maximum absorption wavelength. <sup>b</sup>Maximum molar absorption coefficient. <sup>c</sup>Maximum fluorescence wavelength. <sup>d</sup>Fluorescence quantum yield. <sup>e</sup>Fluorescence lifetime. <sup>f</sup>Ref. S6; <sup>g</sup>The dye is poorly soluble in *c*-hex. <sup>h</sup>The dye is poorly soluble in EtOAc. *c*-hex: cyclohexane; EtOAc: ethyl acetate; MeOH: methanol.

**Table S2.** Maximum visible  $g_{abs}$  and  $g_{lum}$  values in CHCl<sub>3</sub> (*ca.*  $2 \times 10^{-5}$  and  $1 \times 10^{-3}$ , respectively) of chiral dissimilar-at-boron *N*-BODIPYs, and **NBDP-9**.

| Dye             | $10^3 \times g_{abs}^a$ | $10^3 \times g_{lum}^b$ |
|-----------------|-------------------------|-------------------------|
| <b>NBDP-6</b>   | -0.1                    | -0.8                    |
| <b>NBDP-7-R</b> | +1.4                    | +0.4                    |
| <b>NBDP-7-S</b> | -1.2                    | -0.8                    |
| <b>NBDP-9</b>   | 0.0                     | +1.0                    |

<sup>a</sup>Kunh's dissymmetry ratio; <sup>b</sup>Luminescence dissymmetry factor.

**Table S3.** Crystallographic data for **NBDP-7-R**.

|                                   |                                                                                             |
|-----------------------------------|---------------------------------------------------------------------------------------------|
| formula                           | C <sub>33</sub> H <sub>43</sub> B <sub>1</sub> N <sub>4</sub> O <sub>5</sub> S <sub>2</sub> |
| formula weight                    | 650.64                                                                                      |
| crystal system                    | hexagonal                                                                                   |
| space group                       | P6 <sub>1</sub>                                                                             |
| a (Å)                             | 18.0361 (3)                                                                                 |
| b (Å)                             | 18.0361 (3)                                                                                 |
| c (Å)                             | 21.5141 (4)                                                                                 |
| α (deg)                           | 90                                                                                          |
| β (deg)                           | 90                                                                                          |
| γ (deg)                           | 120                                                                                         |
| V (Å <sup>3</sup> )               | 6060.92 (16)                                                                                |
| Z                                 | 6                                                                                           |
| Dc (g·cm <sup>-3</sup> )          | 1.070                                                                                       |
| F(000)                            | 2076.0                                                                                      |
| Data/restraints/parameters        | 7475/87/347                                                                                 |
| Goodness of Fit on F <sup>2</sup> | 1.377                                                                                       |
| R1 (I > 2σ(I))                    | 0.1174                                                                                      |
| wR2 (all data)                    | 0.3395                                                                                      |

## S5. Figures

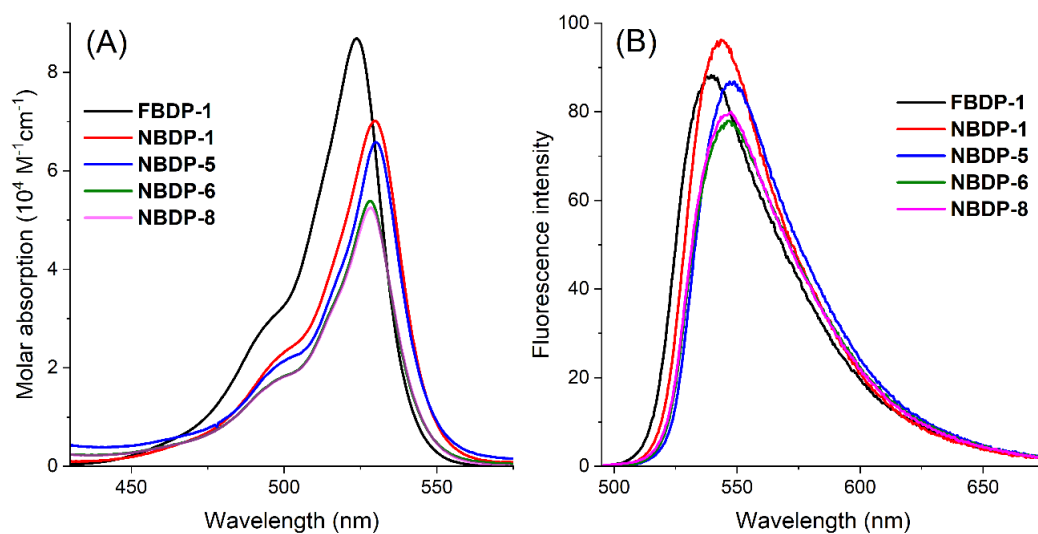

**Fig. S1.** Absorption (A) and fluorescence (B, scaled by their efficiency) spectra of **FBDP-1** (PM567) and PM567-based dissimilar-at-boron *N*-BODIPYs **NBDP-1**, **NBDP-5**, **NBDP-6** and **NBDP-8** in cyclohexane (*ca.*  $2 \times 10^{-6}$  M).

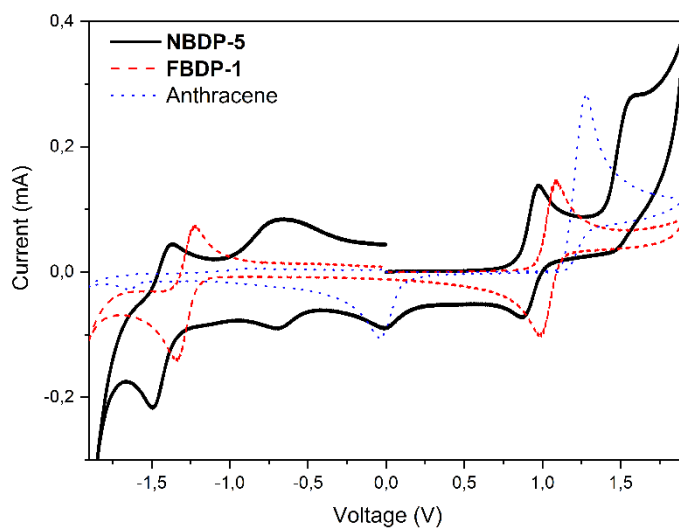

**Fig. S2.** Cyclic voltammogram of **NBDP-5** (black, bold) and its corresponding isolated chromophoric units: *F*-BODIPY **FBDP-1** (red, dotted) and anthracene (blue, dotted), in acetonitrile.

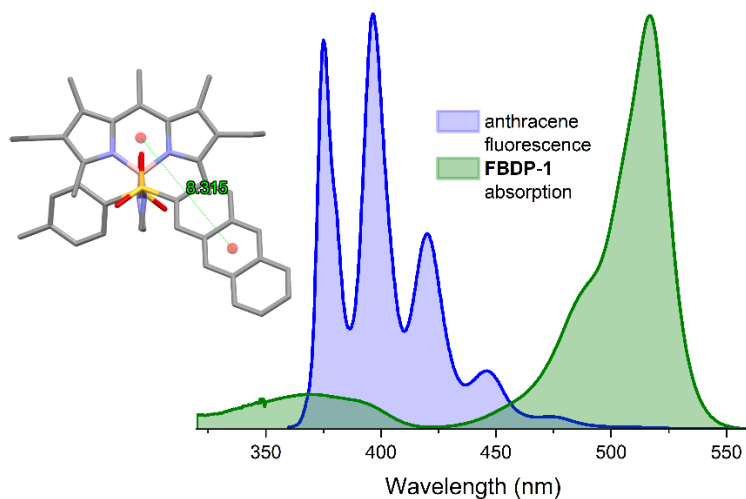

**Fig. S3.** Normalized fluorescence spectrum of anthracene (blue) and UV-Vis absorption spectrum of **FBDP-1** (green) in cyclohexane. The ground state optimized geometry (B3LYP/6-311g\*) of **NBDP-5** is also enclosed to highlight the mutual orientation and distance between the acting chromophores (*ca.* 8.3 Å) in the molecular array.

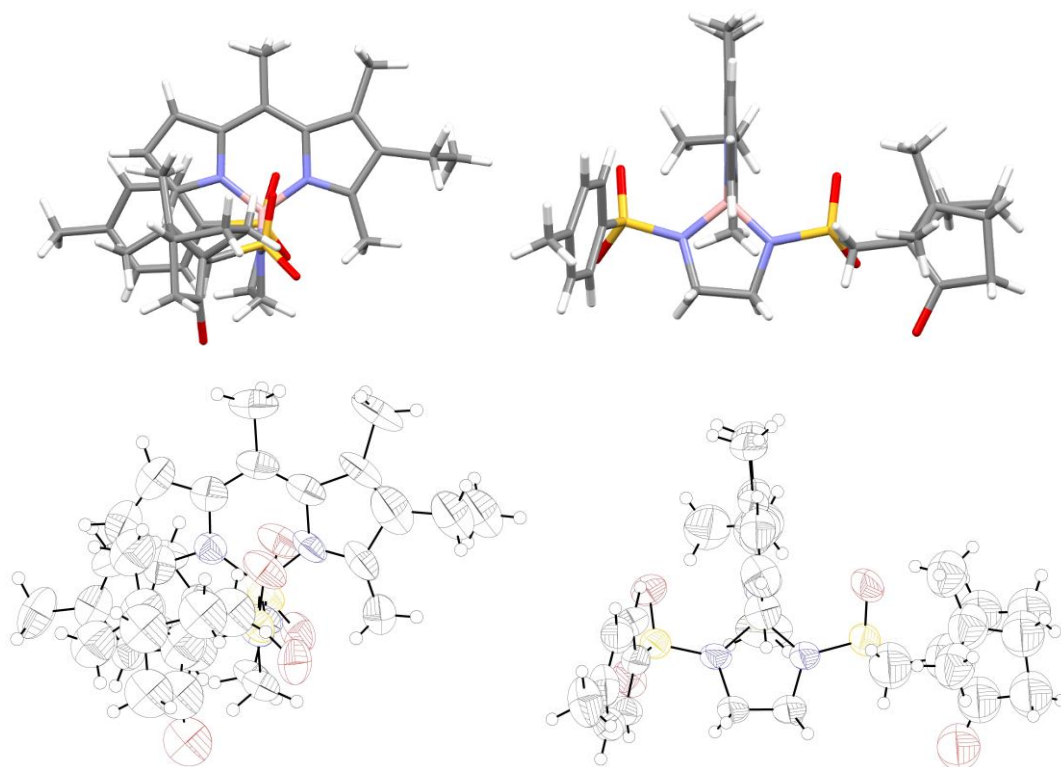

**Fig. S4.** Molecular structure (top, sticks; bottom, ORTEP) of **NBDP-7-R** determined by X-ray diffraction in frontal view (left) and side view (right).

## S6. References

- S1. H. P. J. M. Dekkers, P. F. Moraal, J. M. Timper, J. P.; Riehl, *Appl. Spectrosc.*, 1985, **39**, 818.
- S2. Bolte, F. P. Cordelières, *J. Microsc.*, 2006, **224**, 213-232.
- S3. C. Ray, A. García-Sampedro, C. Schad, E. Avellanal-Zaballa, F. Moreno, M. J. Ortiz, J. Bañuelos, A. Villanueva, P. Acedo, B. L. Maroto and S. de la Moya, *Chem. Proc.*, 2021, **3**, 15.
- S4. S. St John-Campbell, A. J. P. White and J. A. Bull, *Chem. Sci.*, 2017, **8**, 4840-4847.
- S5. J. Bañuelos, I. Lopez-Arbeloa, I. García-Moreno, A. Costela, L. Infante, E. Perez-Ojeda, M. Palacios-Cuesta and M. J. Ortiz, *Chem. Eur. J.*, 2010, **16**, 14094-14105.
- S6. C. Ray, L. Díaz-Casado, E. Avellanal-Zaballa, J. Bañuelos, L. Cerdán, I. García-Moreno, F. Moreno, B. L. Maroto, Í. López-Arbeloa and S. de la Moya, *Chem. Eur. J.*, **2017**, *23*, 9383-9390.
